# Supplementary material for: Synthesis and biological evaluation of N-cyanoalkyl-, N-aminoalkyl-, and N-guanidinoalkyl-substituted 4-aminoquinoline derivatives as potent, selective, brain permeable antitrypanosomal agents
Source: PubMed Central journal article supplement (PMC5080452; doi:10.1016/j.bmc.2016.08.036), 2016-11-01
Supplement: mmc1.pdf [file mmc1.pdf]

## Supplementary Material

Synthesis and biological evaluation of *N*-cyanoalkyl-, *N*-aminoalkyl-, and *N*-guanidinoalkyl-substituted 4-aminoquinoline derivatives as potent, selective, brain permeable antitrypanosomal agents

Irene Sola<sup>a</sup>, Albert Artigas<sup>a</sup>, Martin C. Taylor<sup>b</sup>, F. Javier Pérez-Areales<sup>a</sup>, Elisabet Viayna<sup>a</sup>, M. Victòria Clos<sup>c</sup>, Belén Pérez<sup>c</sup>, Colin W. Wright<sup>d</sup>, John M. Kelly<sup>b</sup>, Diego Muñoz-Torrero<sup>a,\*</sup>

<sup>a</sup> *Laboratory of Pharmaceutical Chemistry (CSIC Associated Unit), Faculty of Pharmacy and Food Sciences, and Institute of Biomedicine (IBUB), University of Barcelona, Av. Joan XXIII, 27-31, E-08028, Barcelona, Spain*

<sup>b</sup> *Department of Pathogen Molecular Biology, London School of Hygiene and Tropical Medicine, Keppel Street, London WC1E 7HT, United Kingdom*

<sup>c</sup> *Department of Pharmacology, Therapeutics and Toxicology, Institute of Neurosciences, Autonomous University of Barcelona, E-08193, Bellaterra, Barcelona, Spain*

<sup>d</sup> *Bradford School of Pharmacy, University of Bradford, West Yorkshire BD7 1 DP, United Kingdom*

\* Corresponding author. Tel.: +34 934024533; fax: +34 934035941.

*E-mail address: dmunoztorrero@ub.edu (D. Muñoz-Torrero).*

# Copies of $^1\text{H}$ and $^{13}\text{C}$ NMR spectra of the new compounds

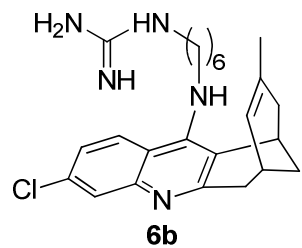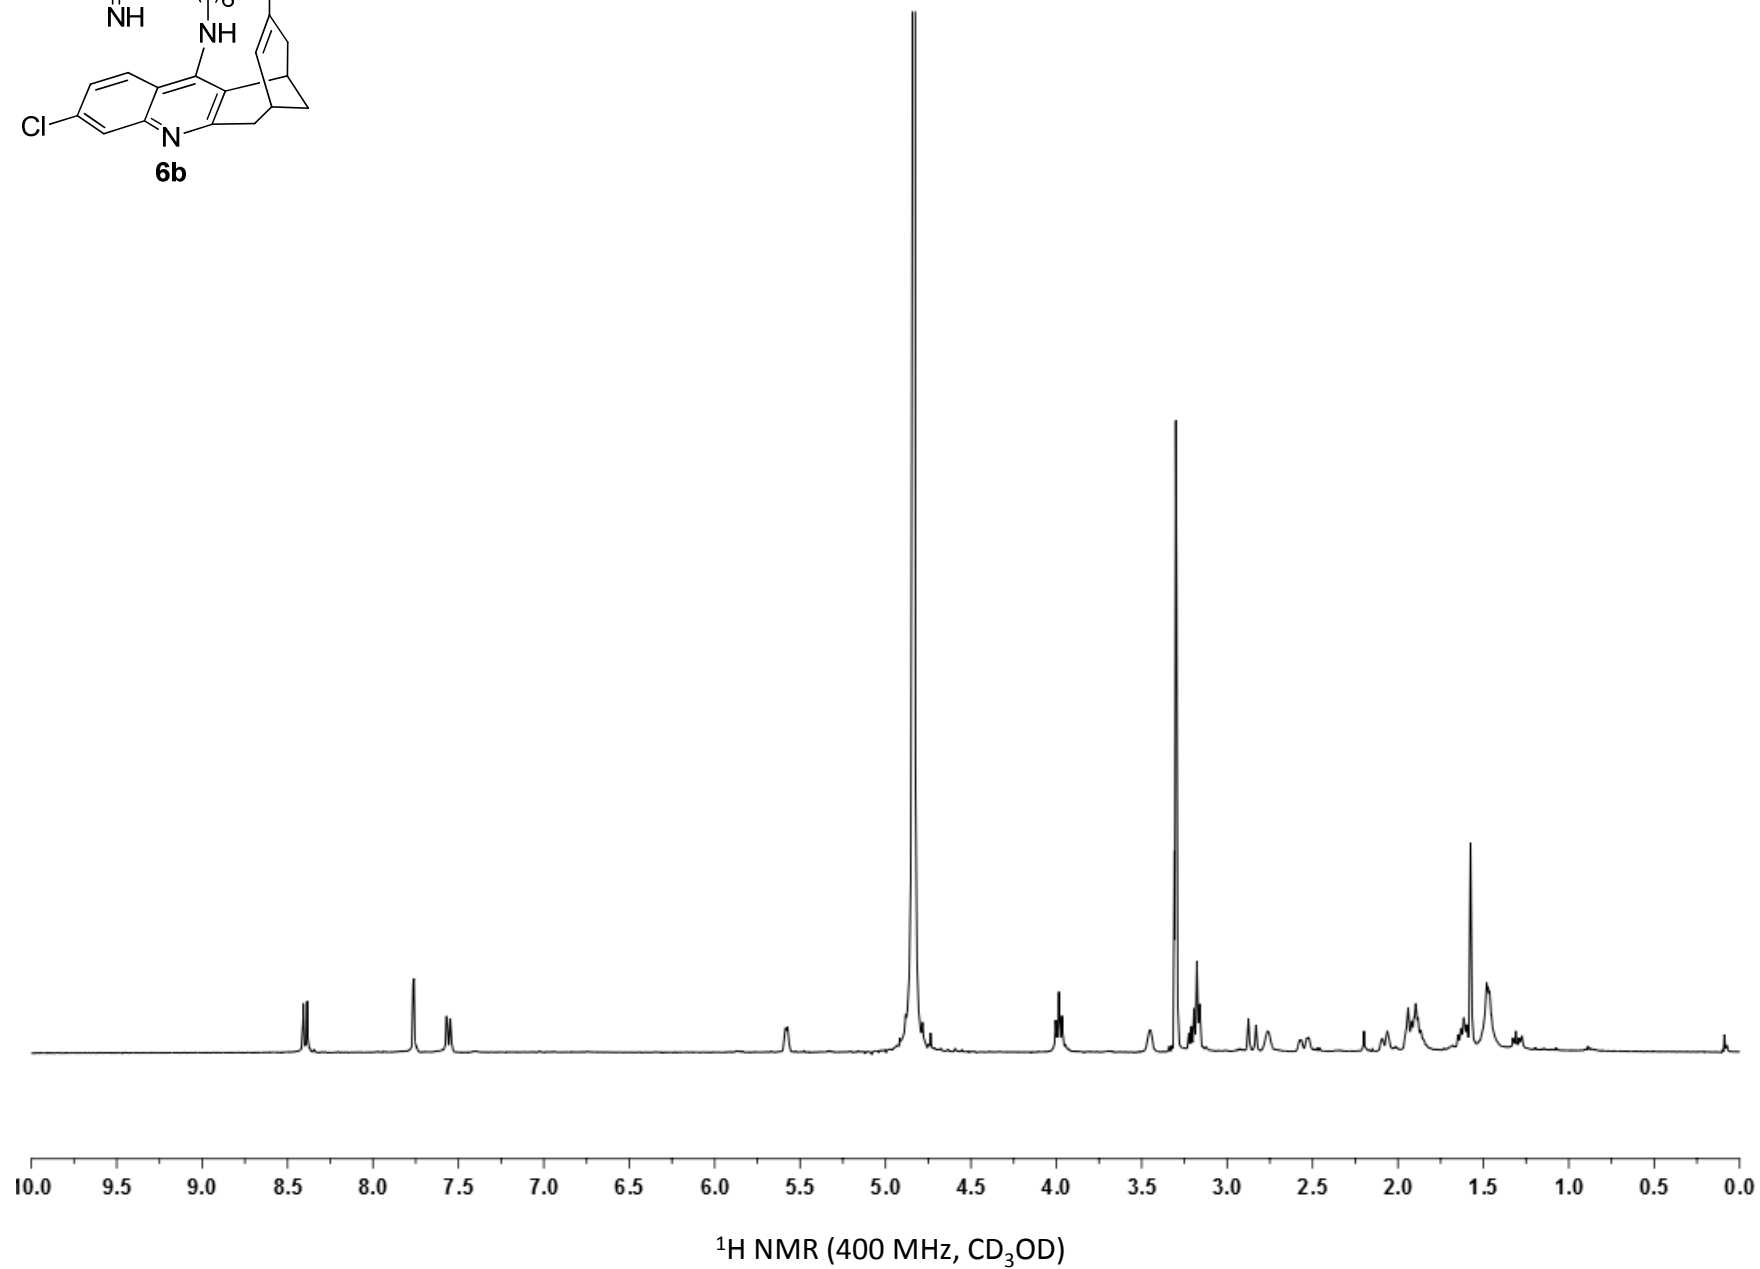

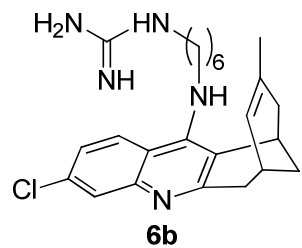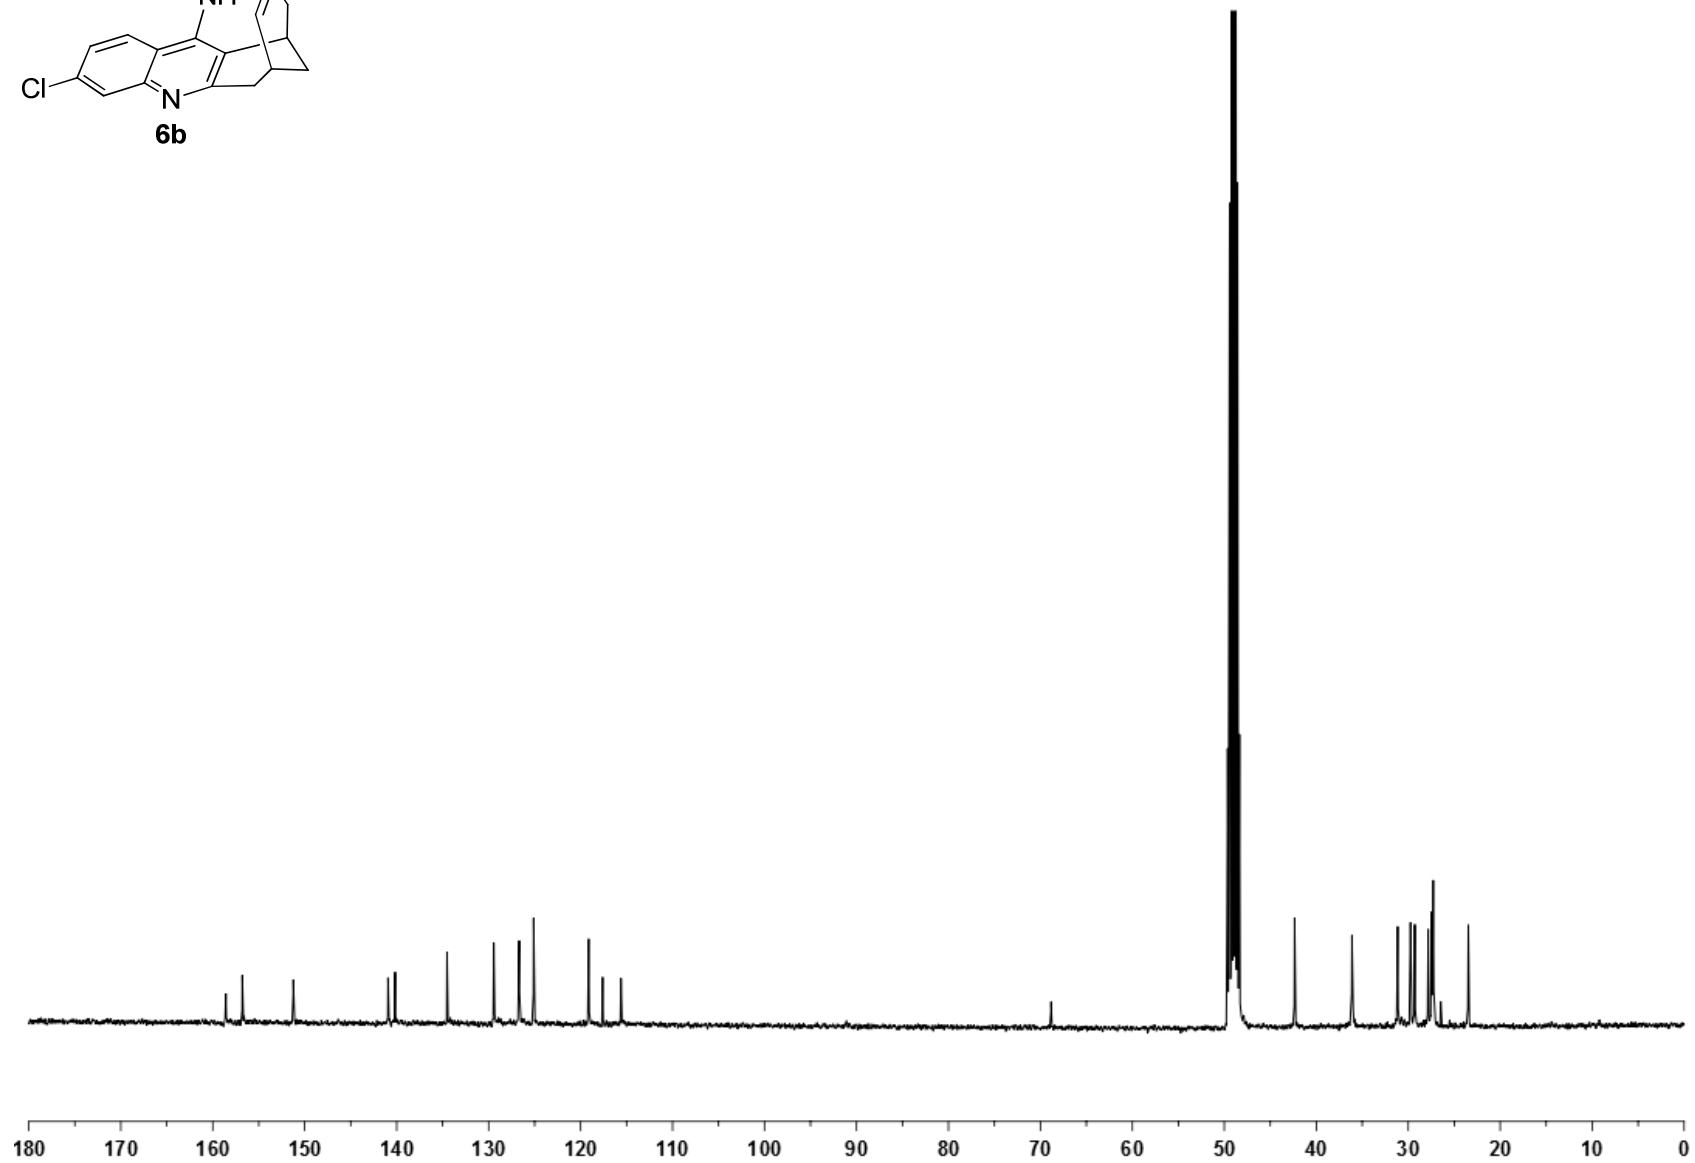

$^{13}\text{C}$  NMR (100.6 MHz, CD<sub>3</sub>OD)

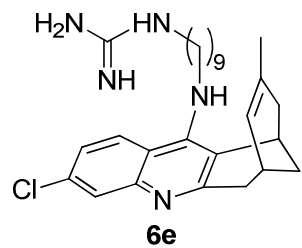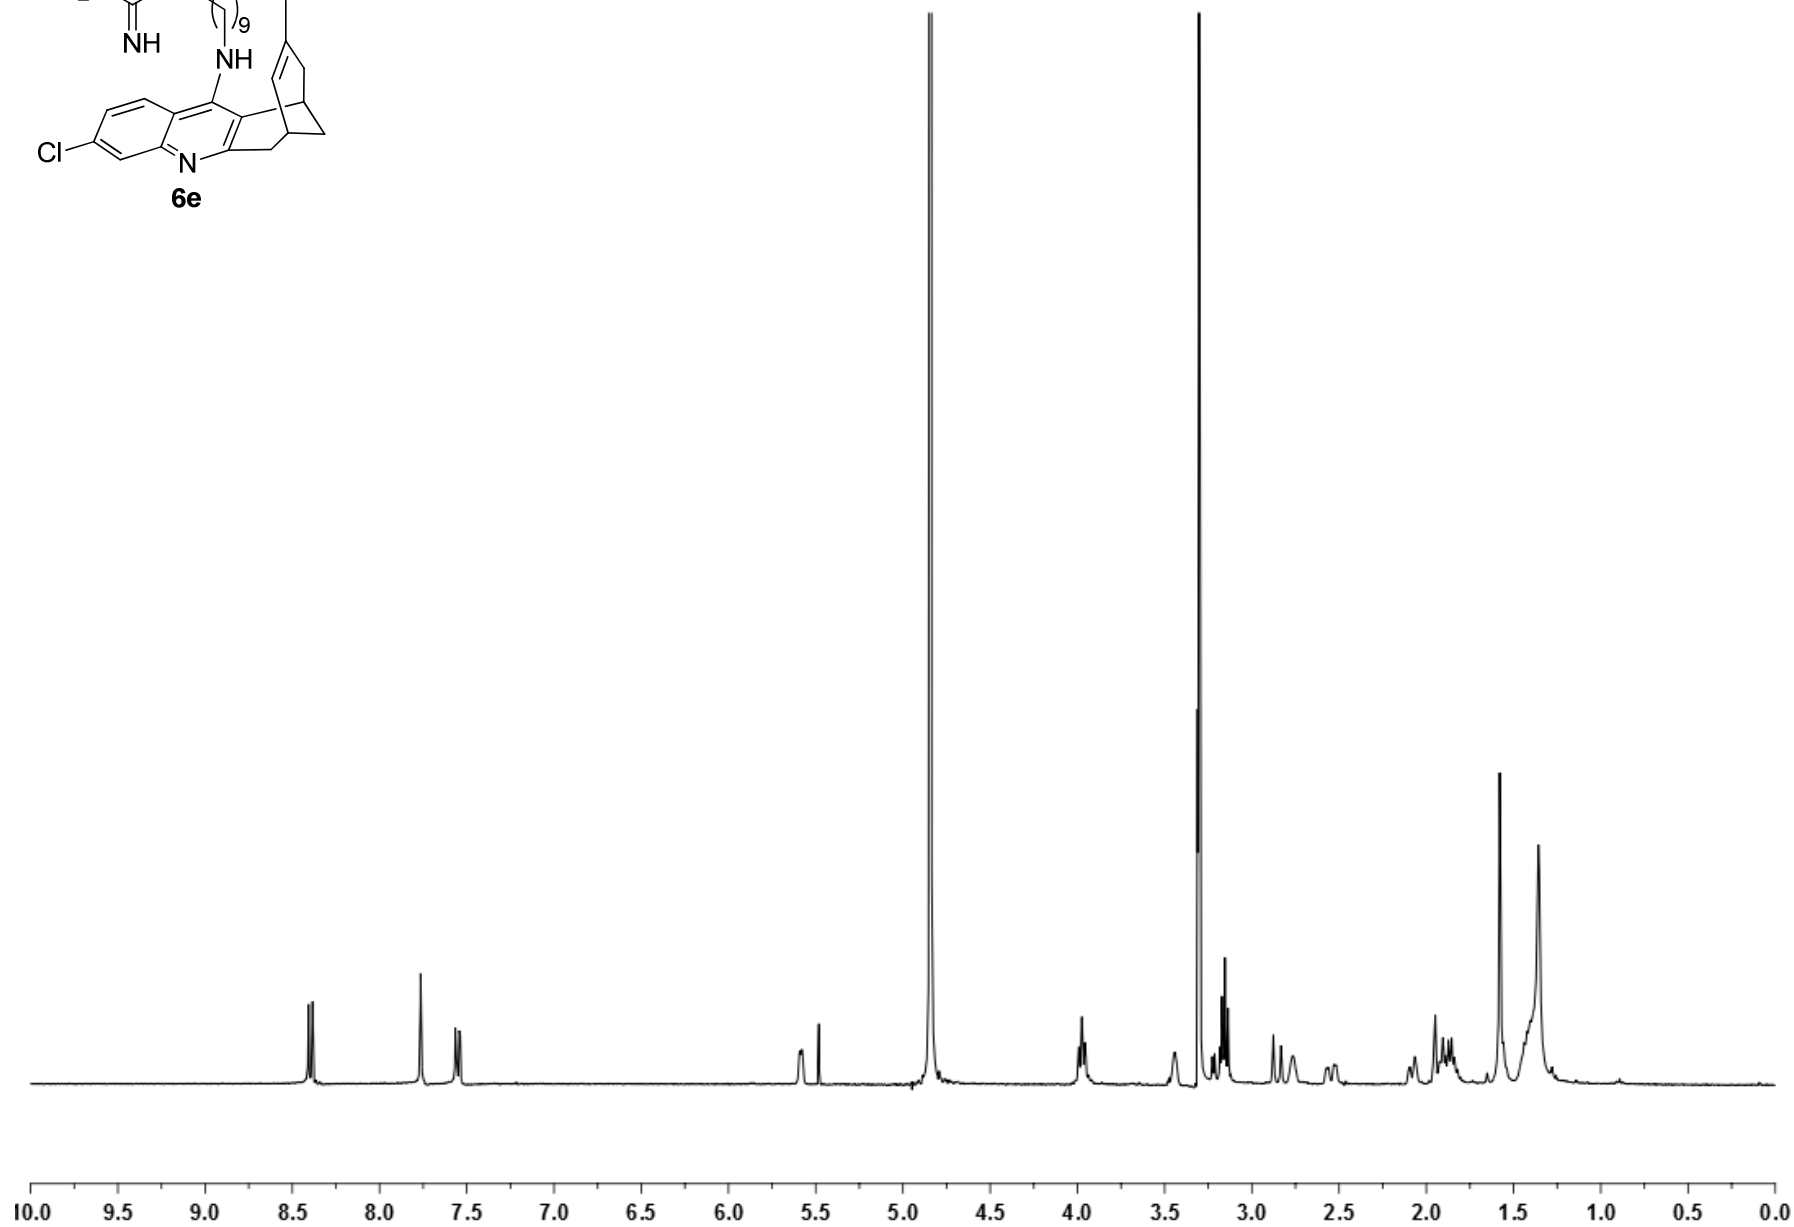

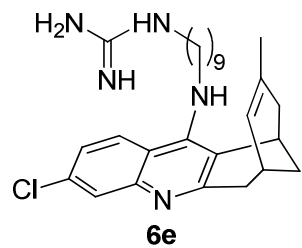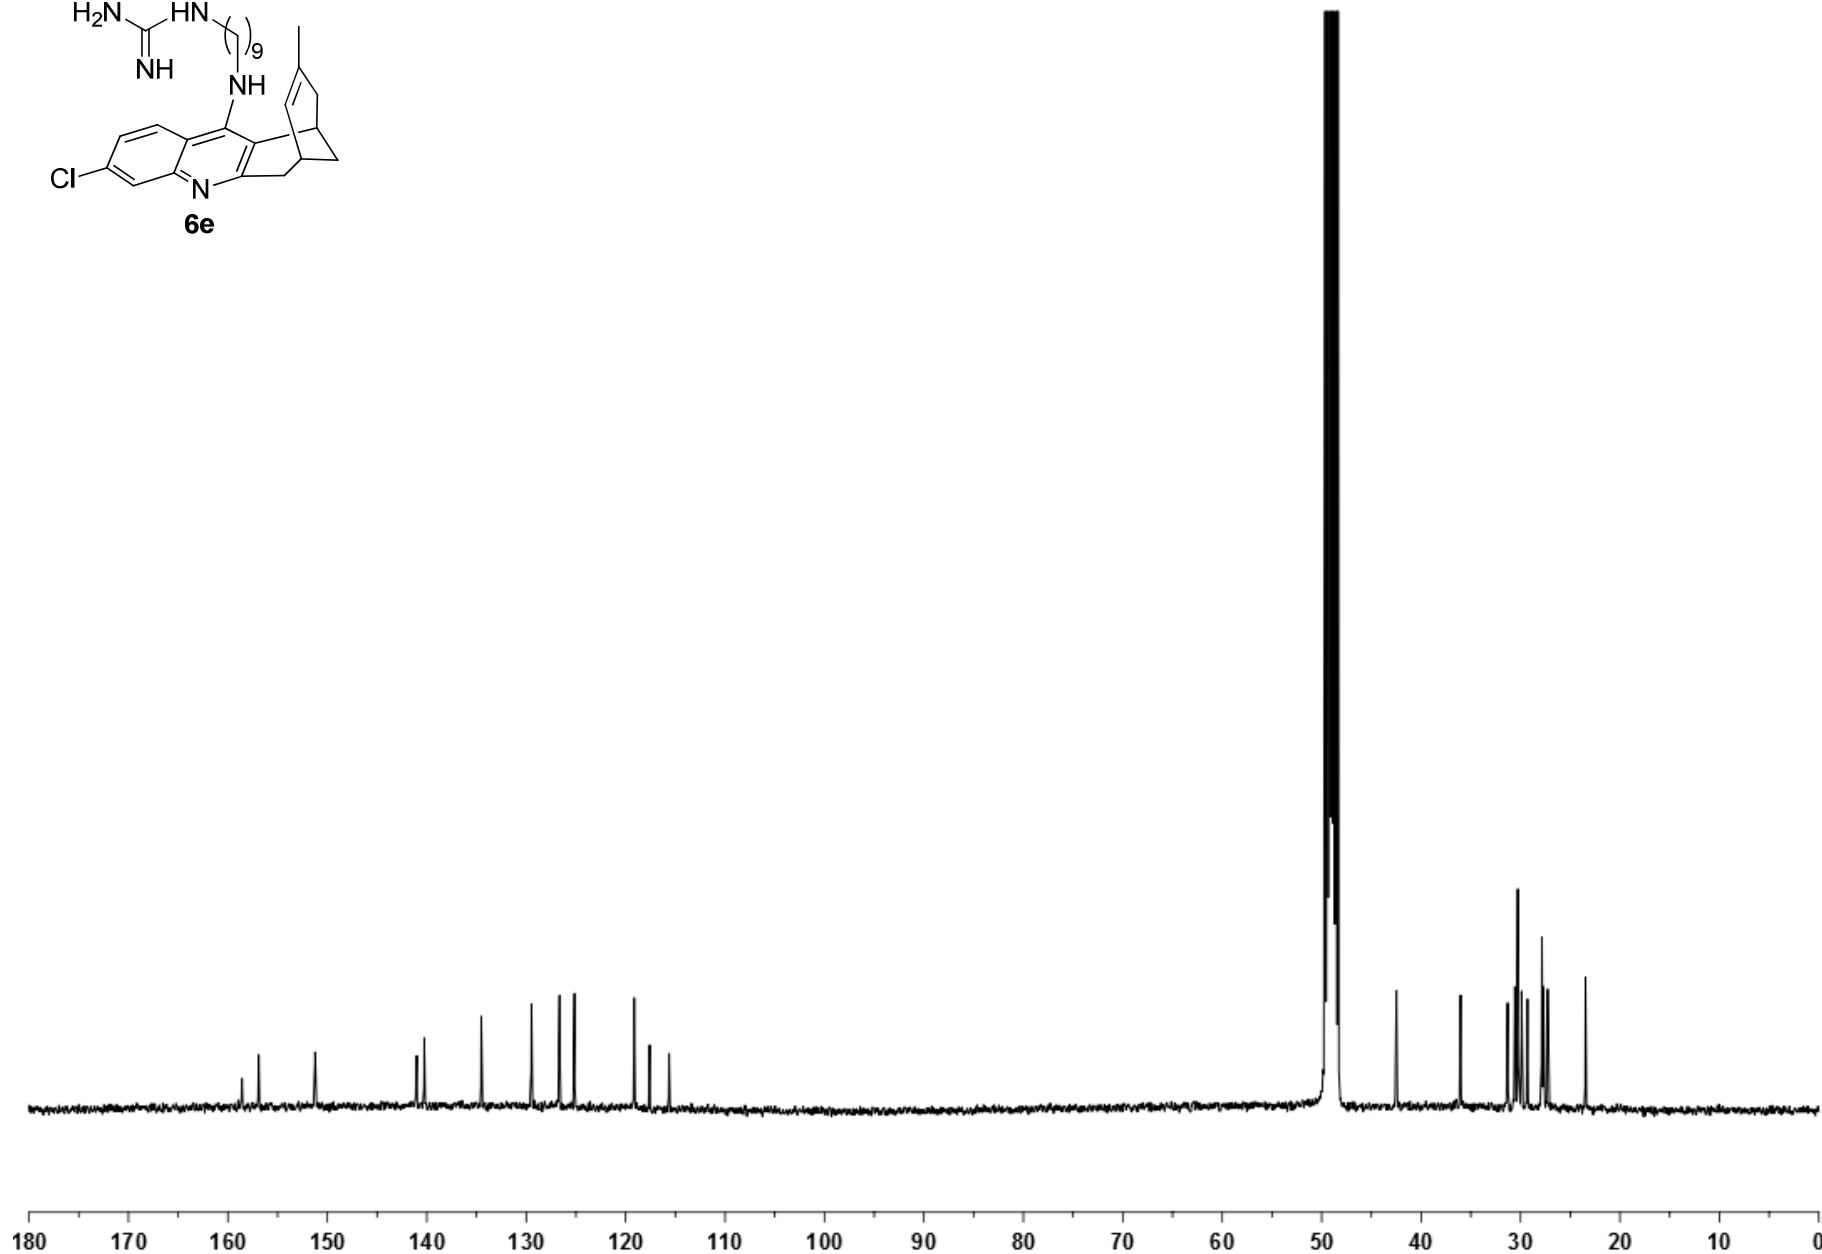

<sup>13</sup>C NMR (100.6 MHz, CD<sub>3</sub>OD)

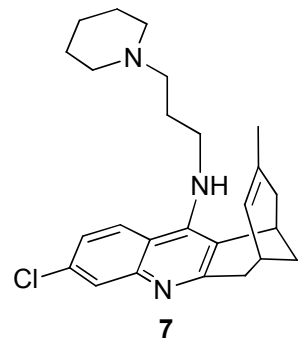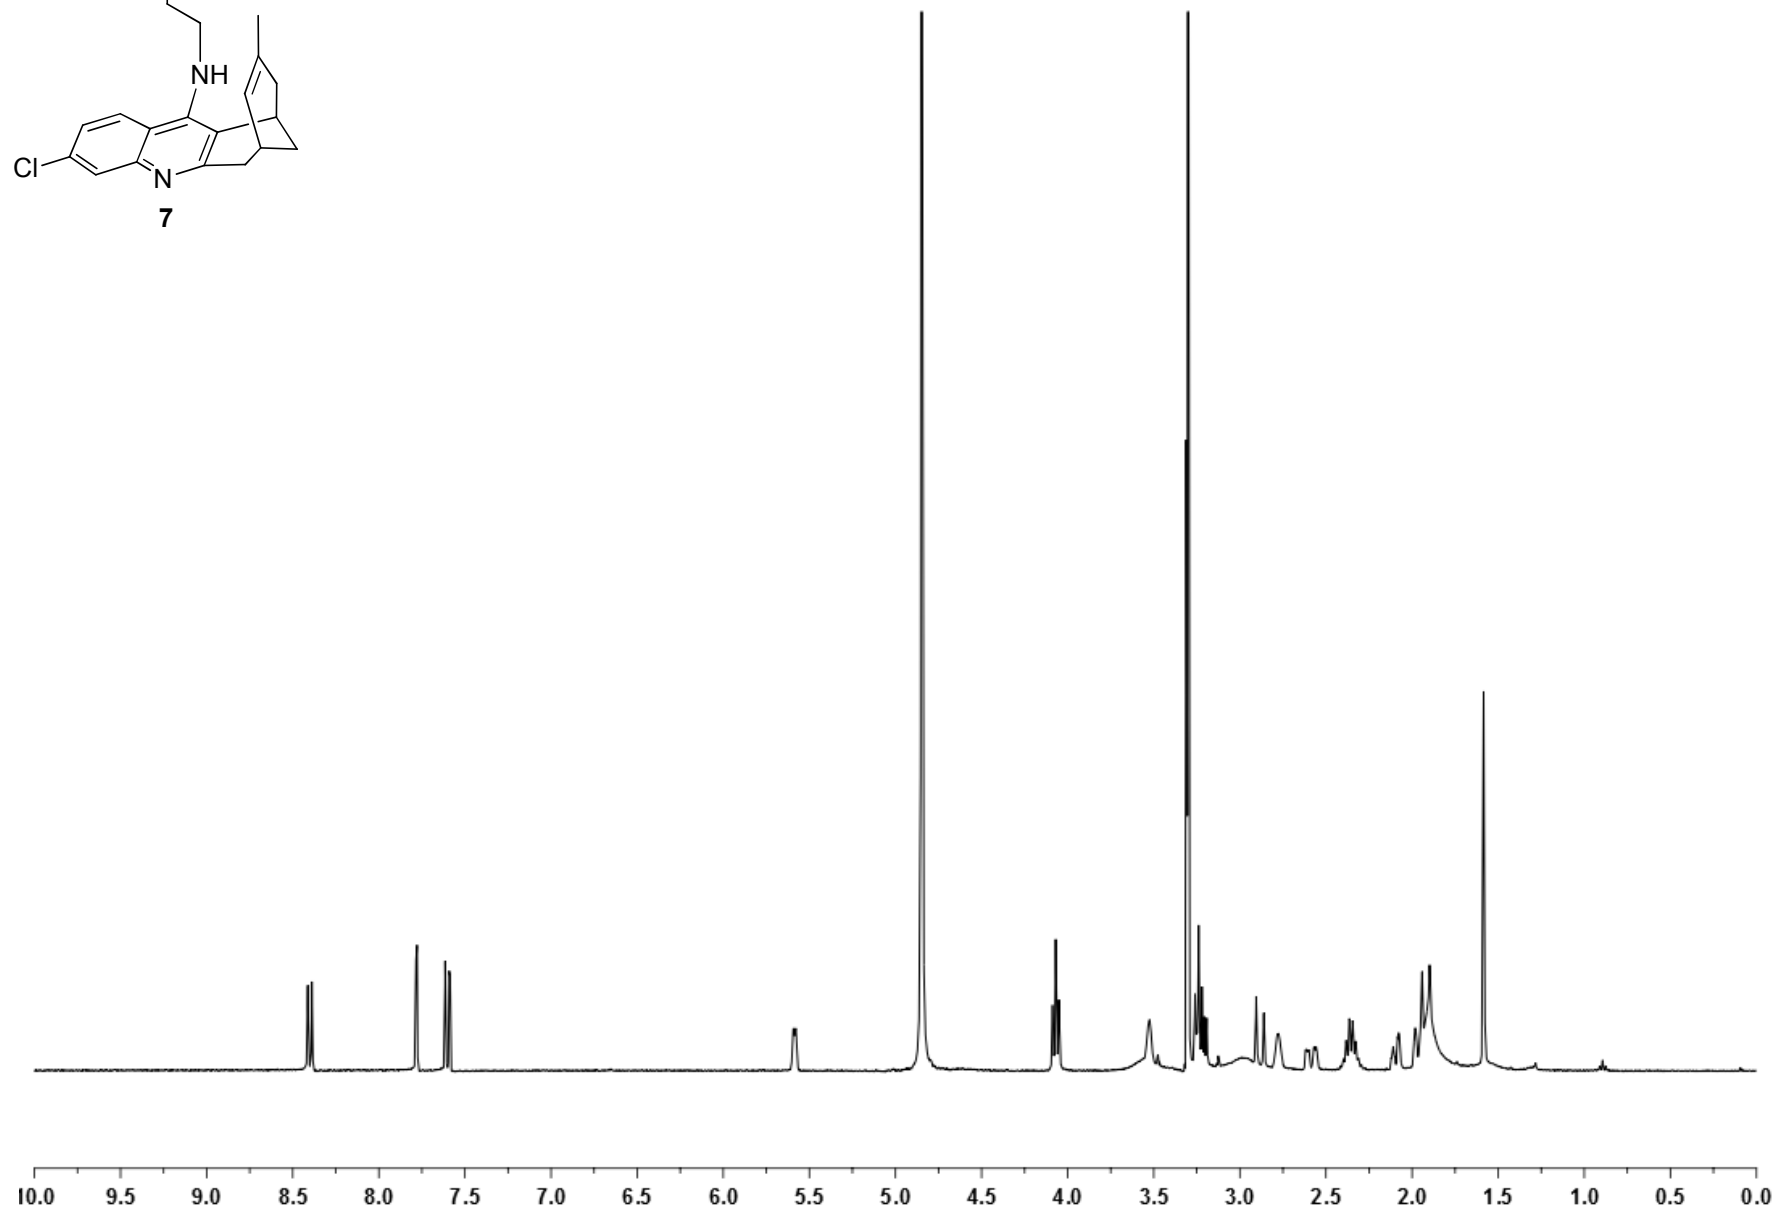

<sup>1</sup>H NMR (400 MHz, CD<sub>3</sub>OD)

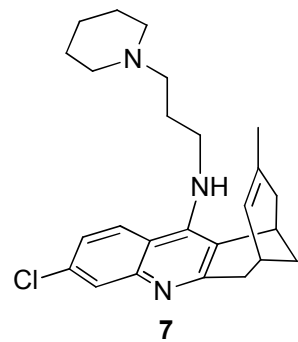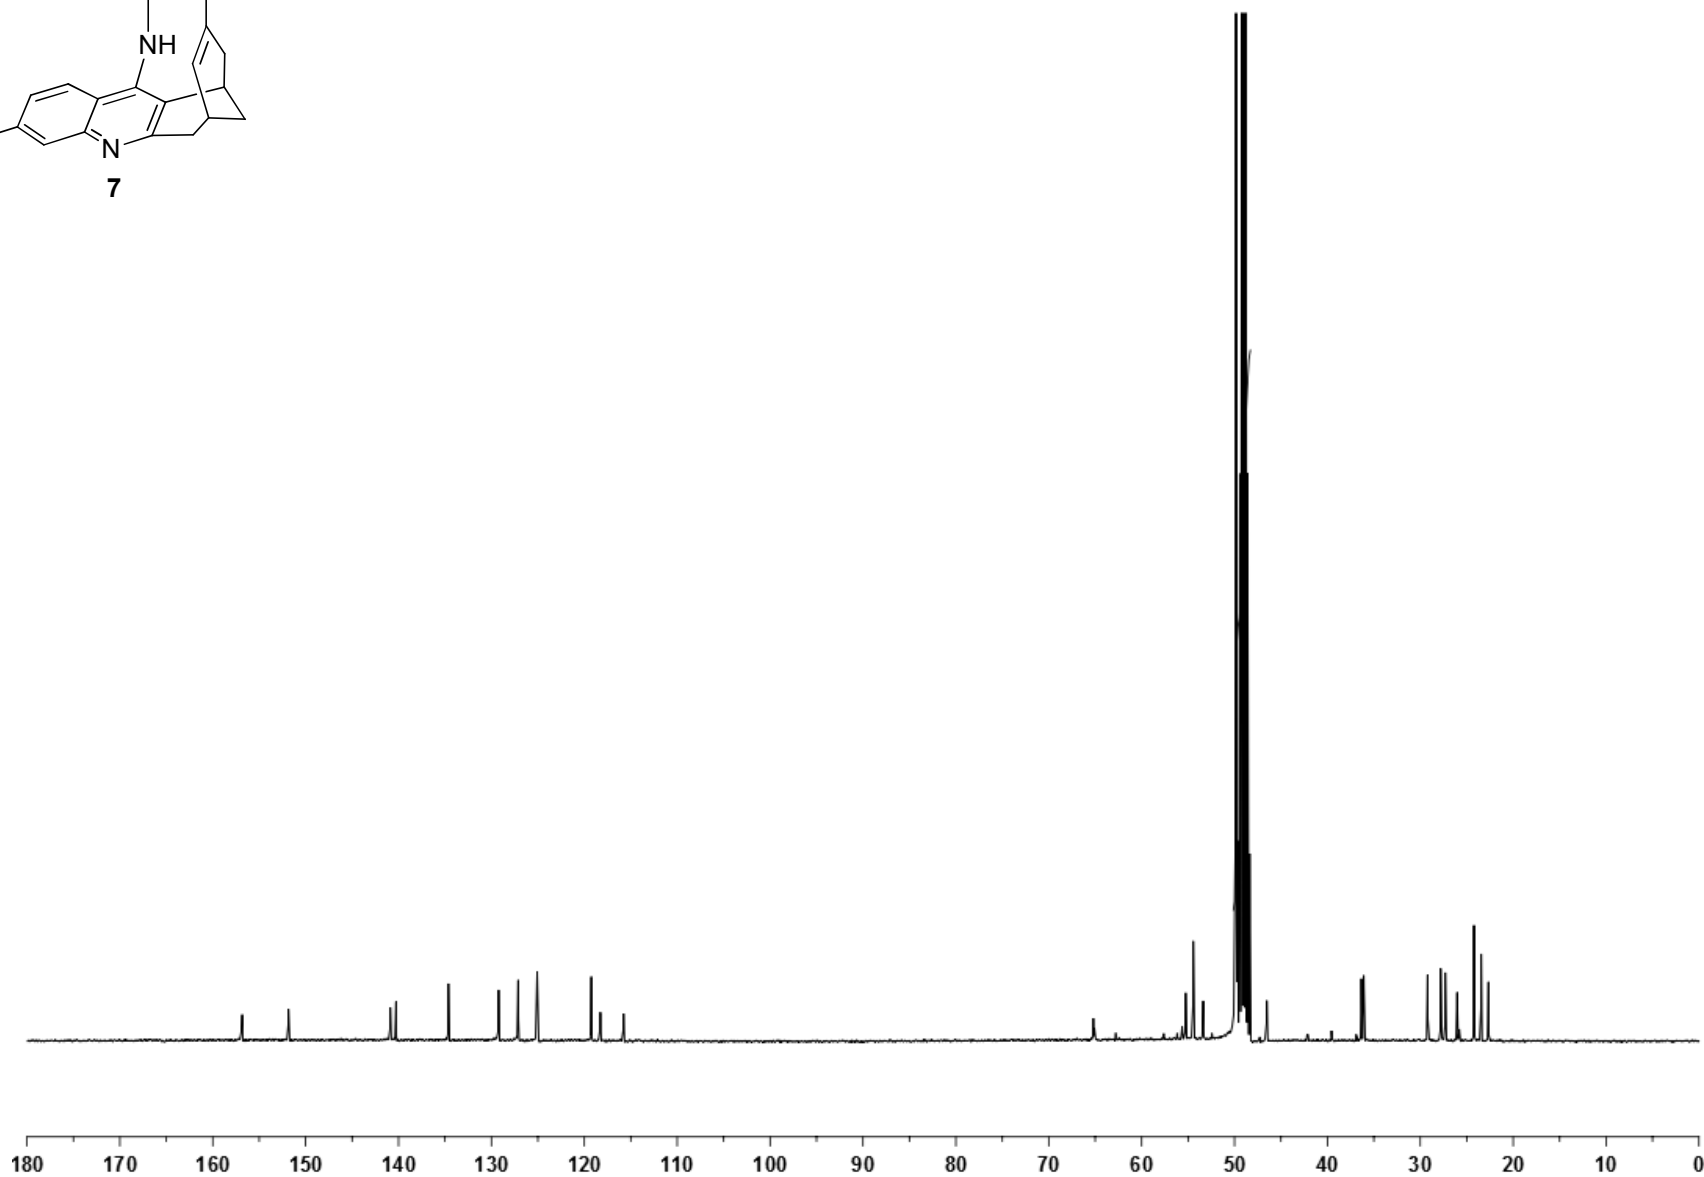

$^{13}\text{C}$  NMR (100.6 MHz,  $\text{CD}_3\text{OD}$ )

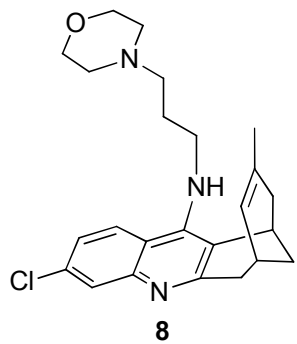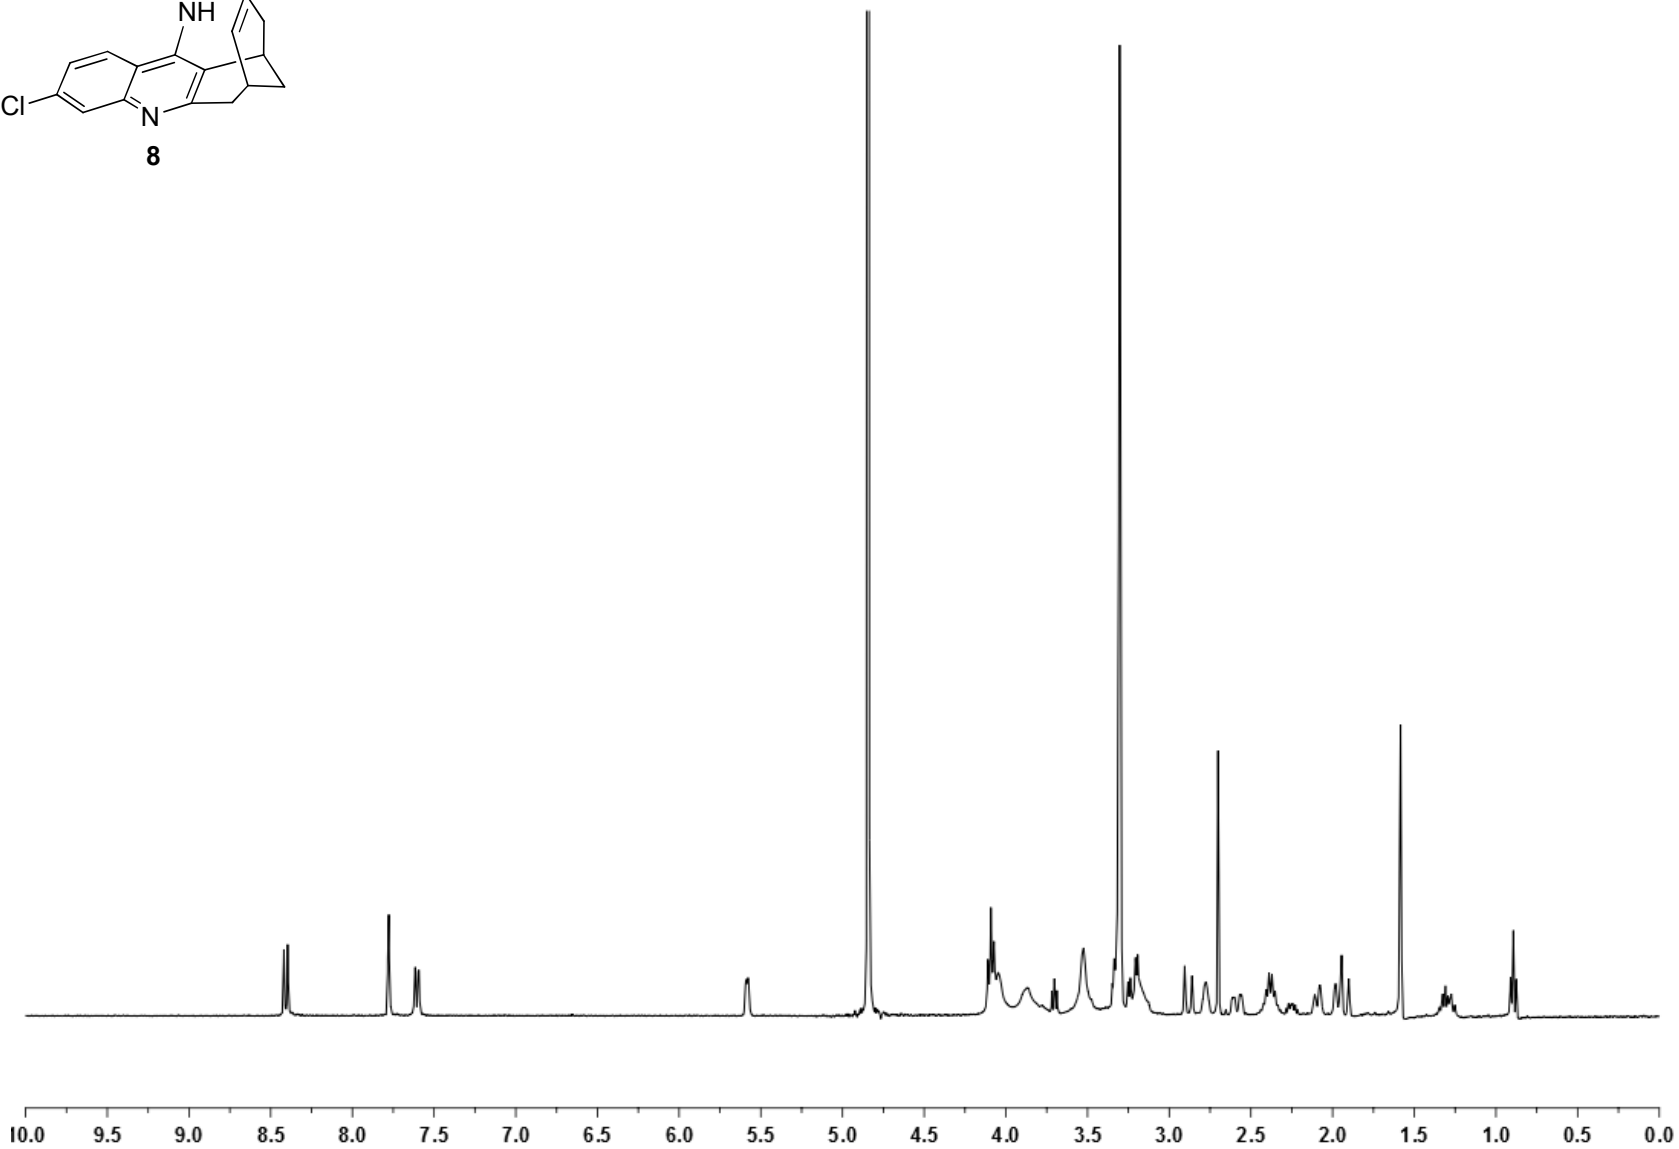

<sup>1</sup>H NMR (400 MHz, CD<sub>3</sub>OD)



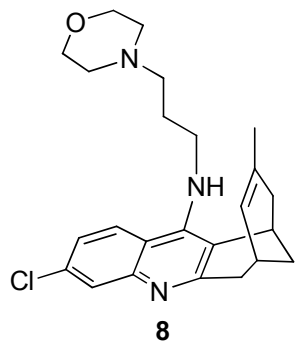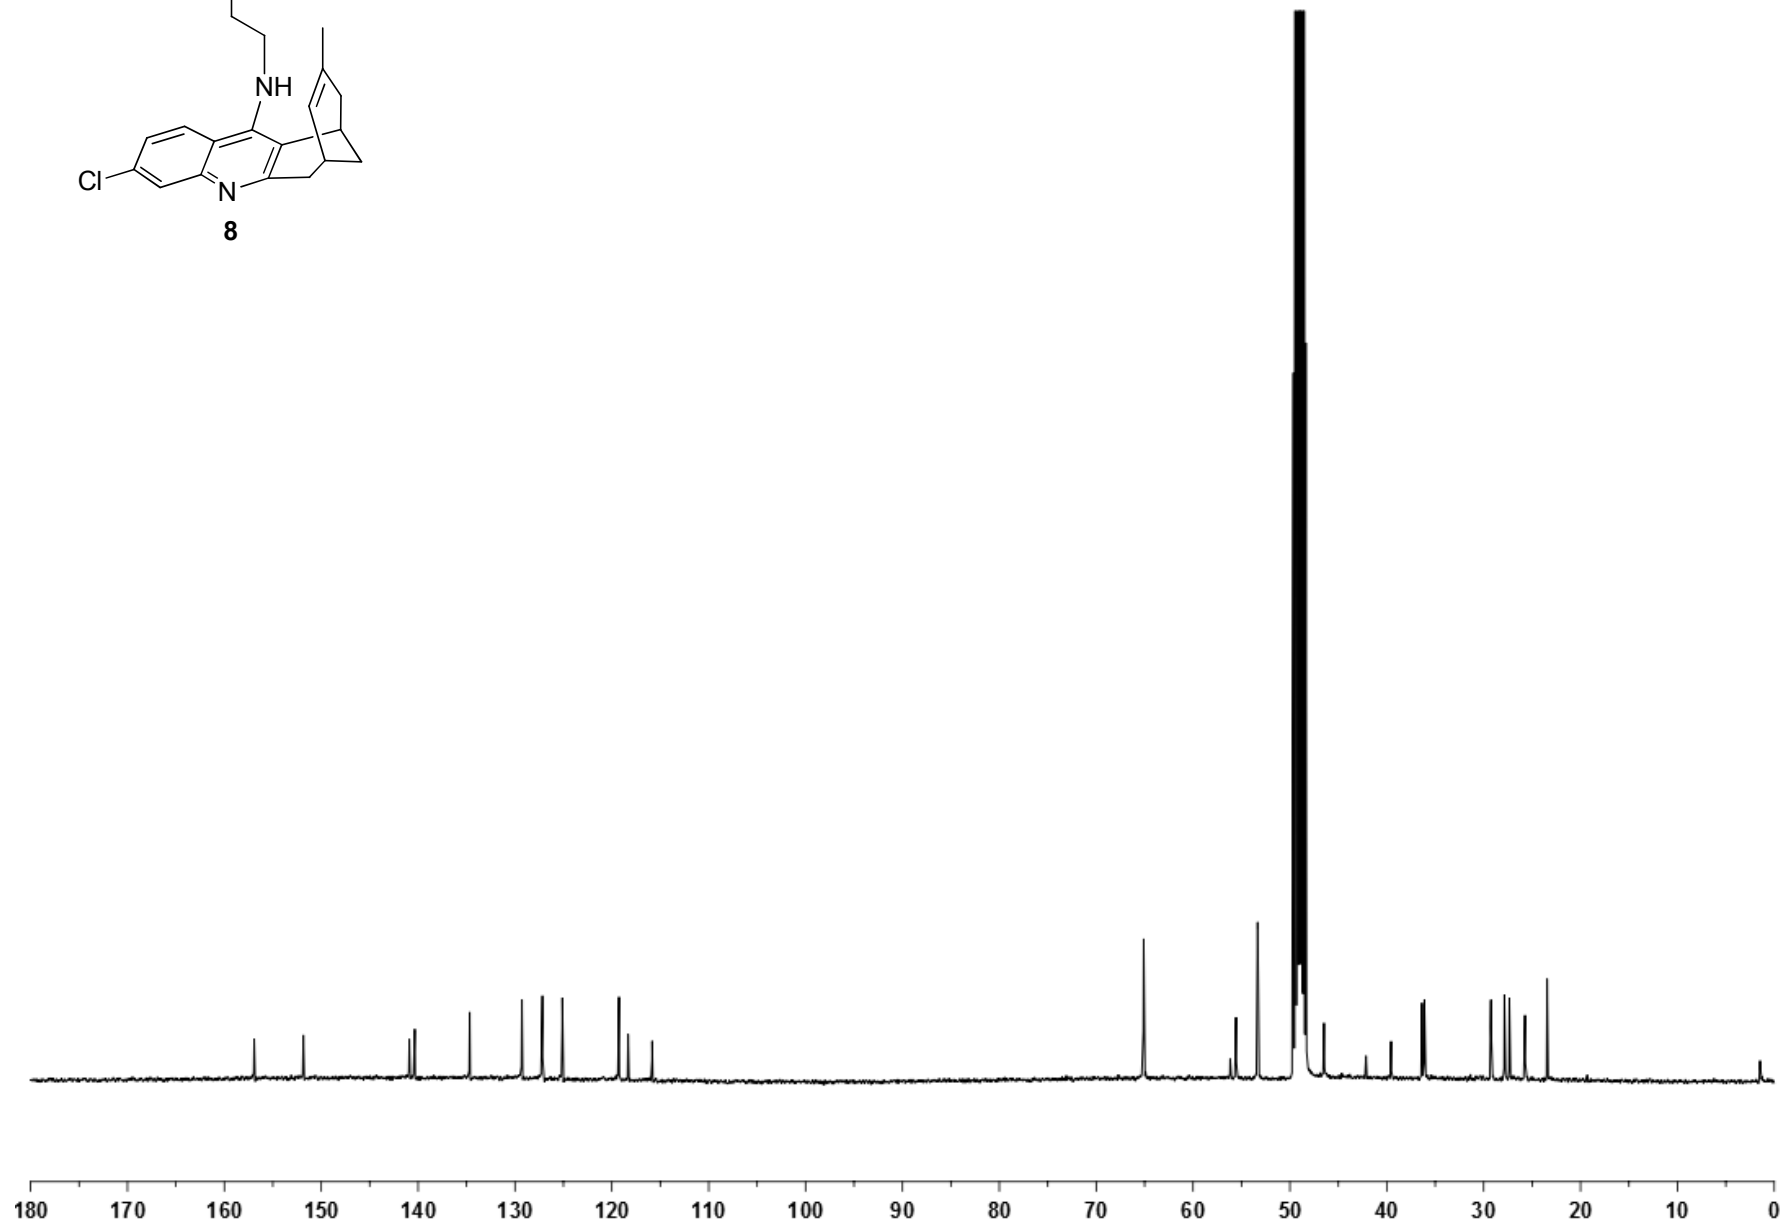

<sup>13</sup>C NMR (100.6 MHz, CD<sub>3</sub>OD)

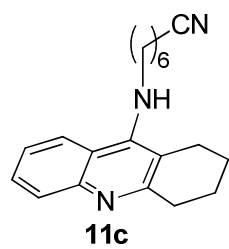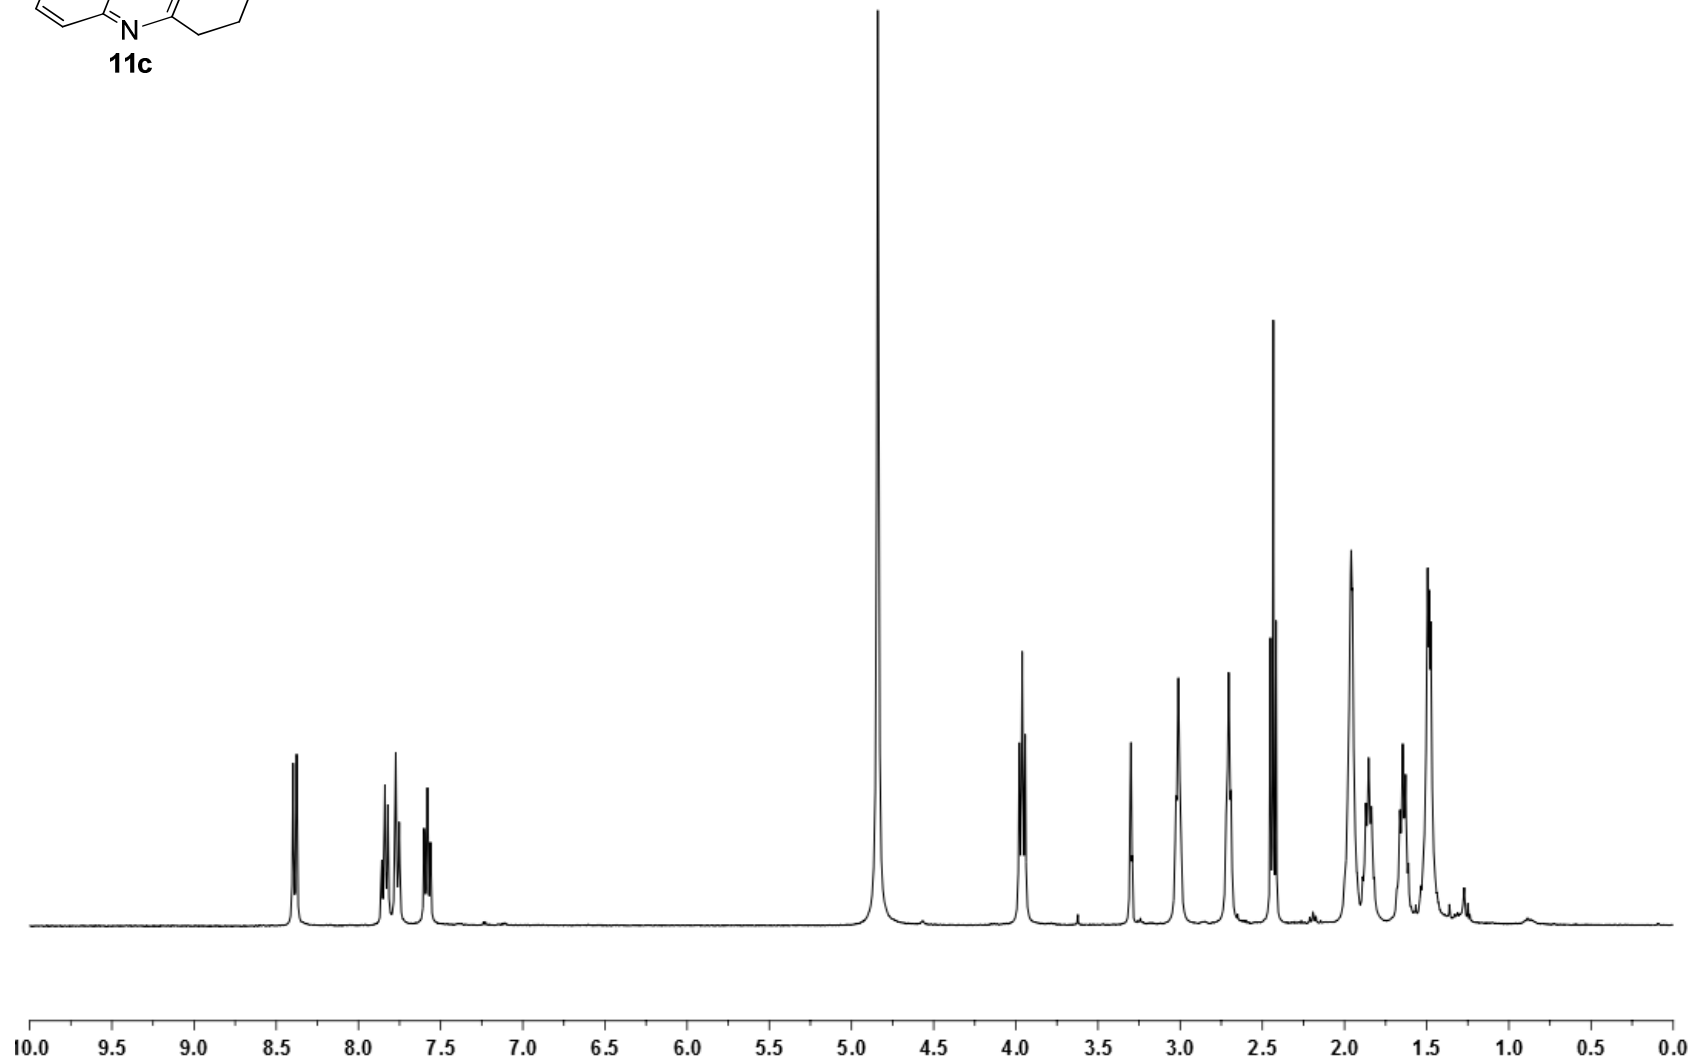

<sup>1</sup>H NMR (400 MHz, CD<sub>3</sub>OD)

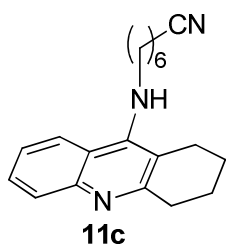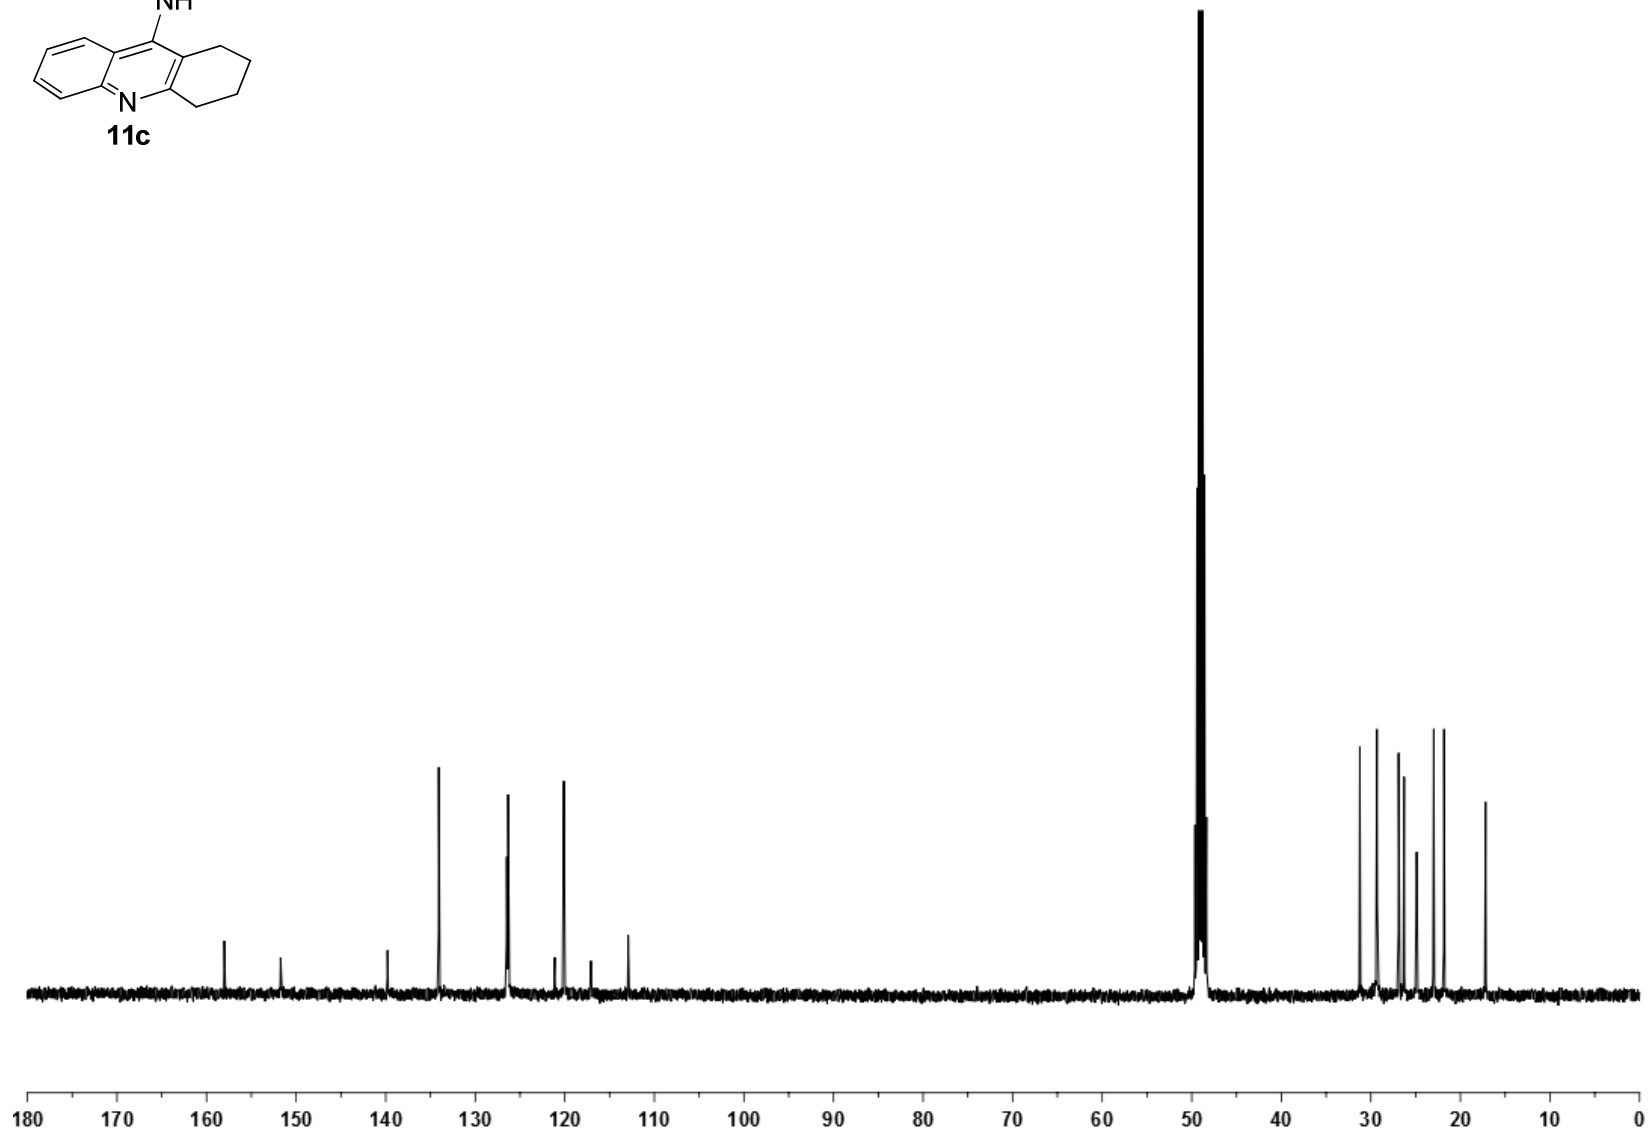

<sup>13</sup>C NMR (100.6 MHz, CD<sub>3</sub>OD)

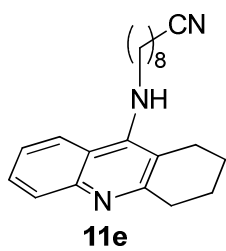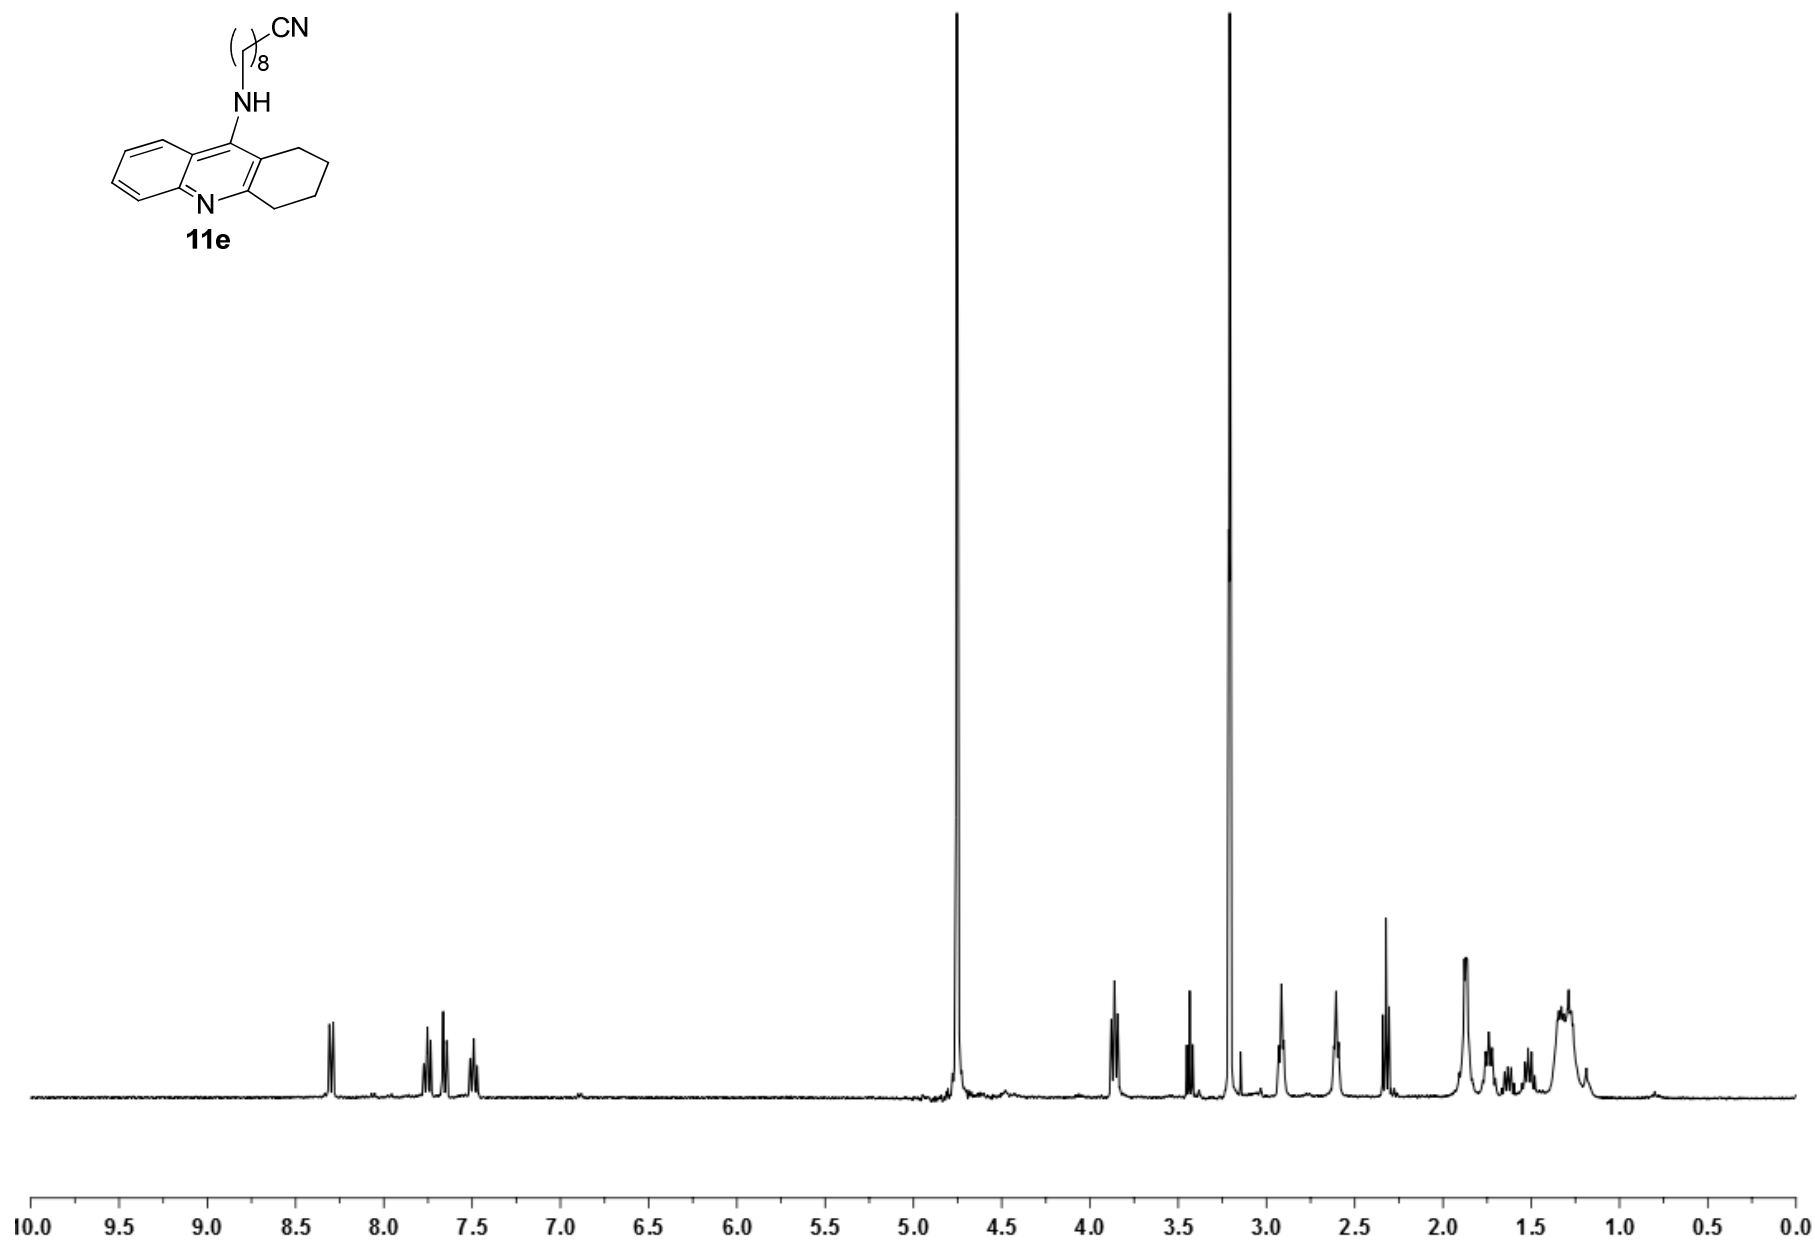

<sup>1</sup>H NMR (400 MHz, CD<sub>3</sub>OD)

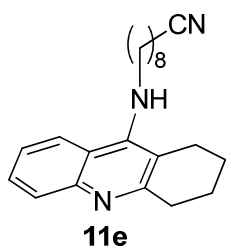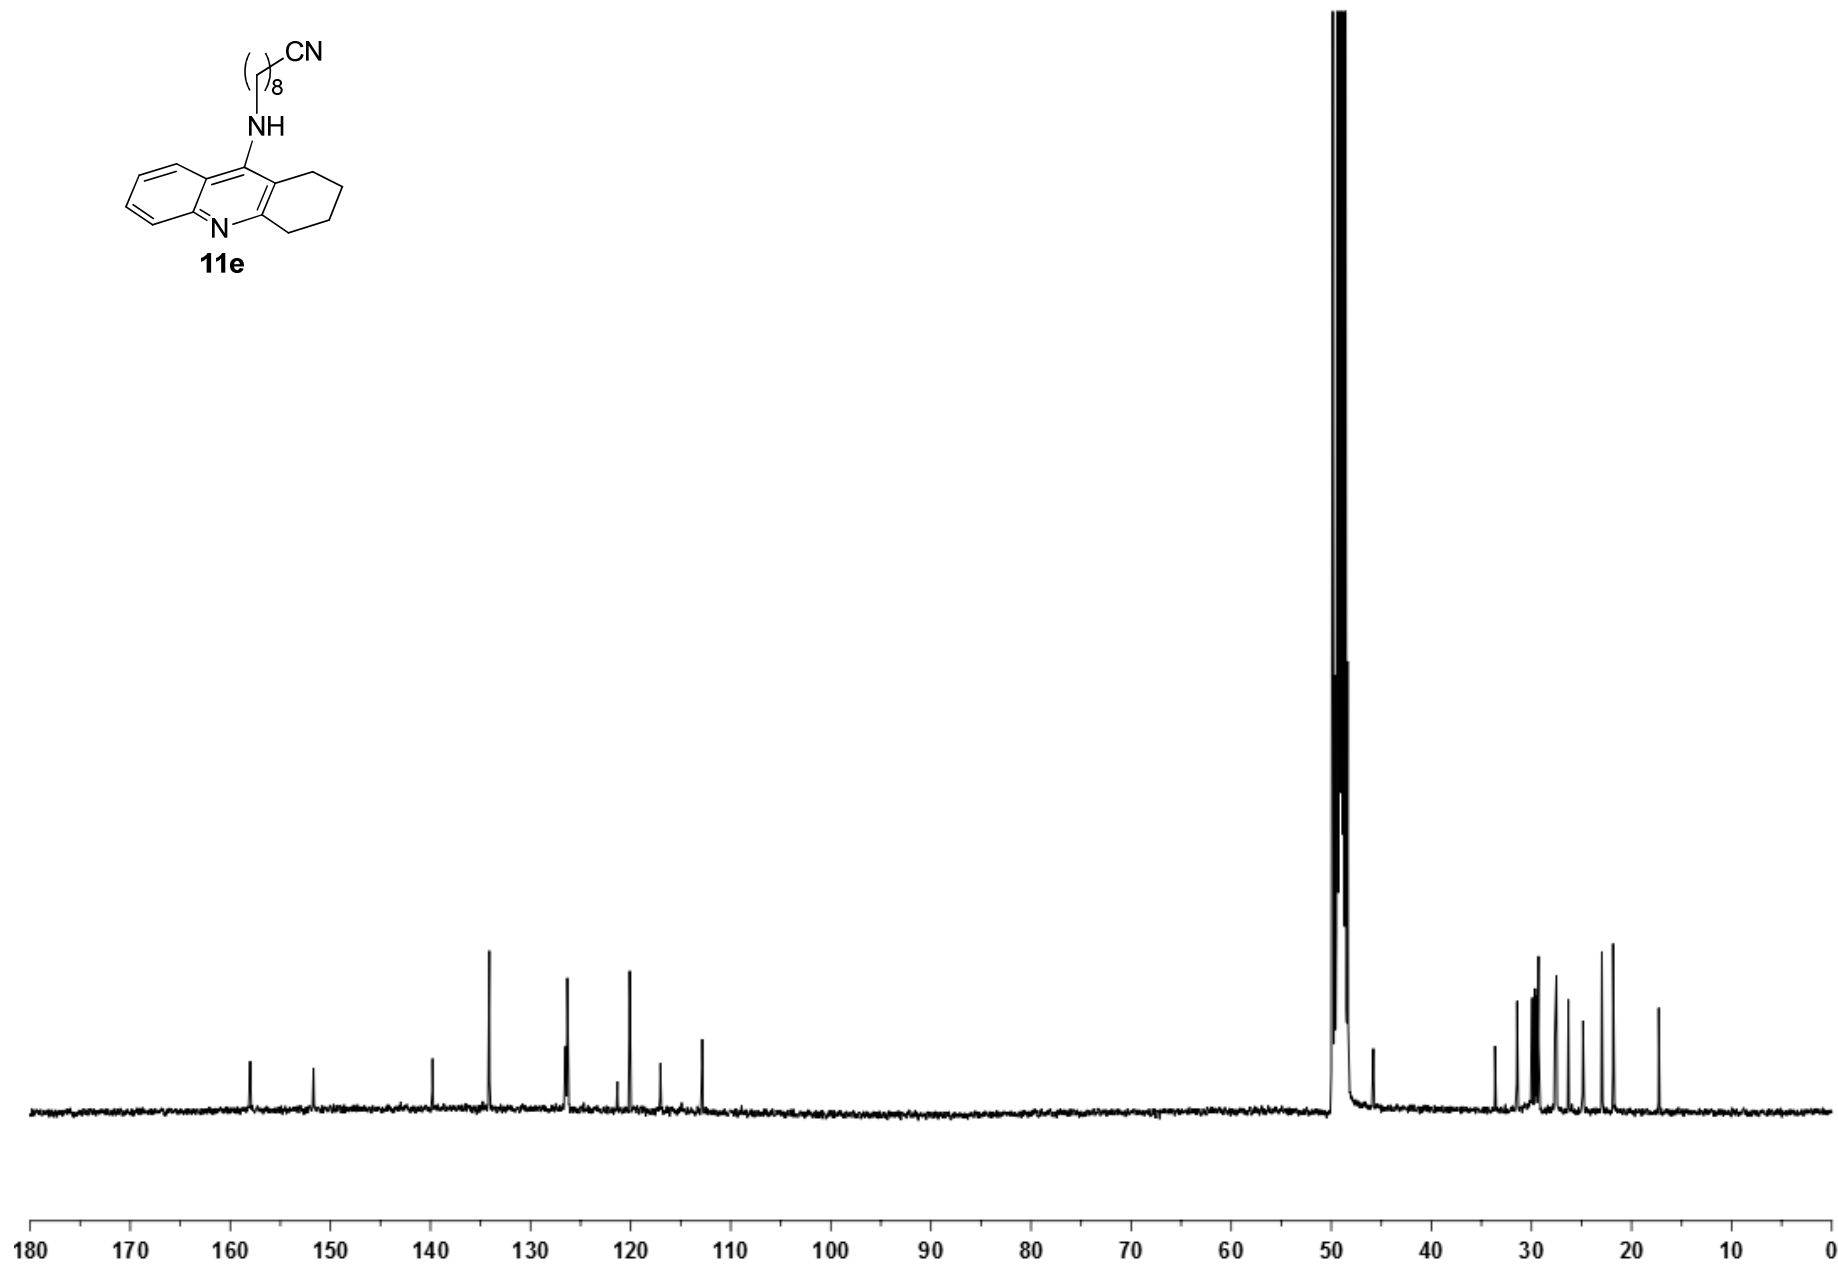

$^{13}\text{C}$  NMR (100.6 MHz,  $\text{CD}_3\text{OD}$ )

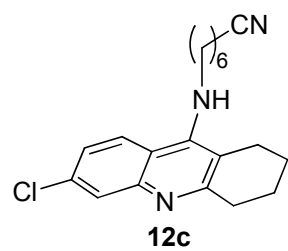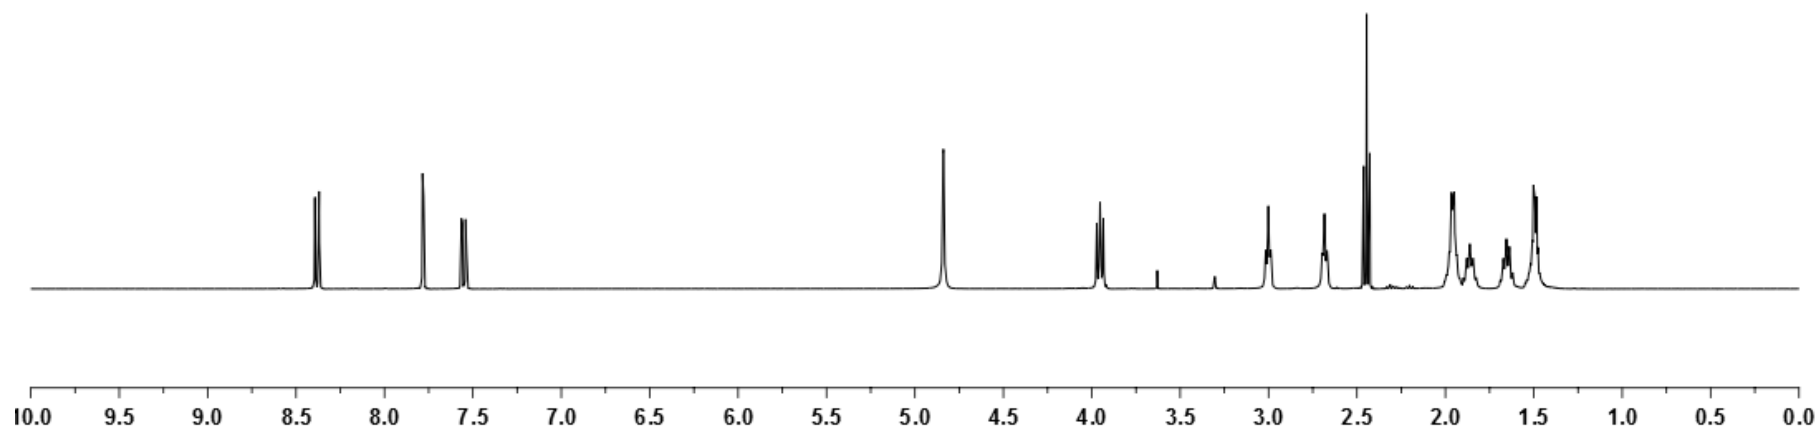

<sup>1</sup>H NMR (400 MHz, CD<sub>3</sub>OD)

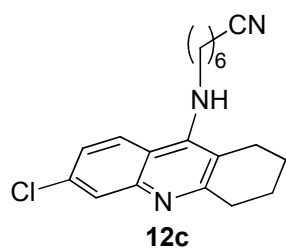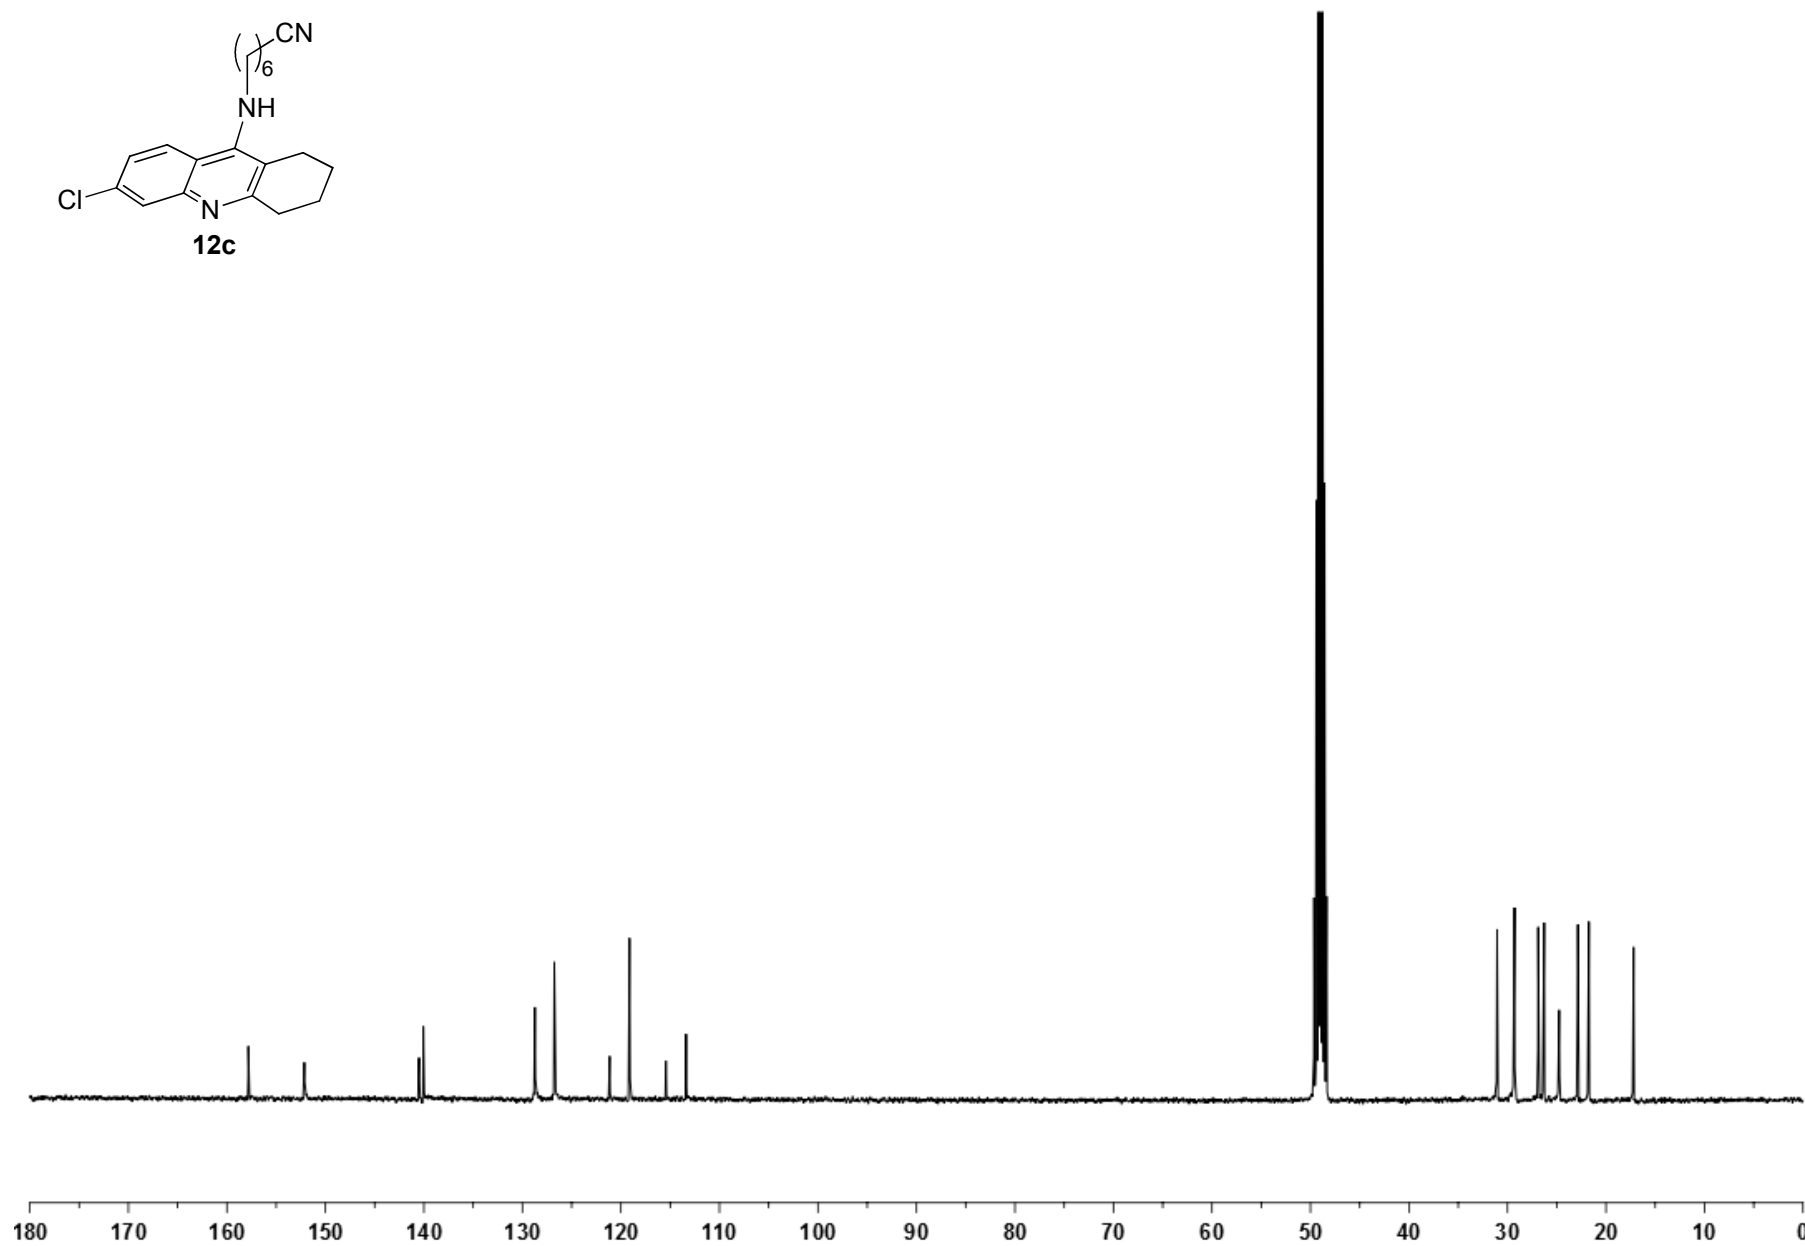

<sup>13</sup>C NMR (100.6 MHz, CD<sub>3</sub>OD)

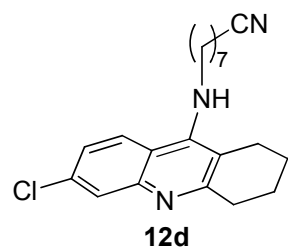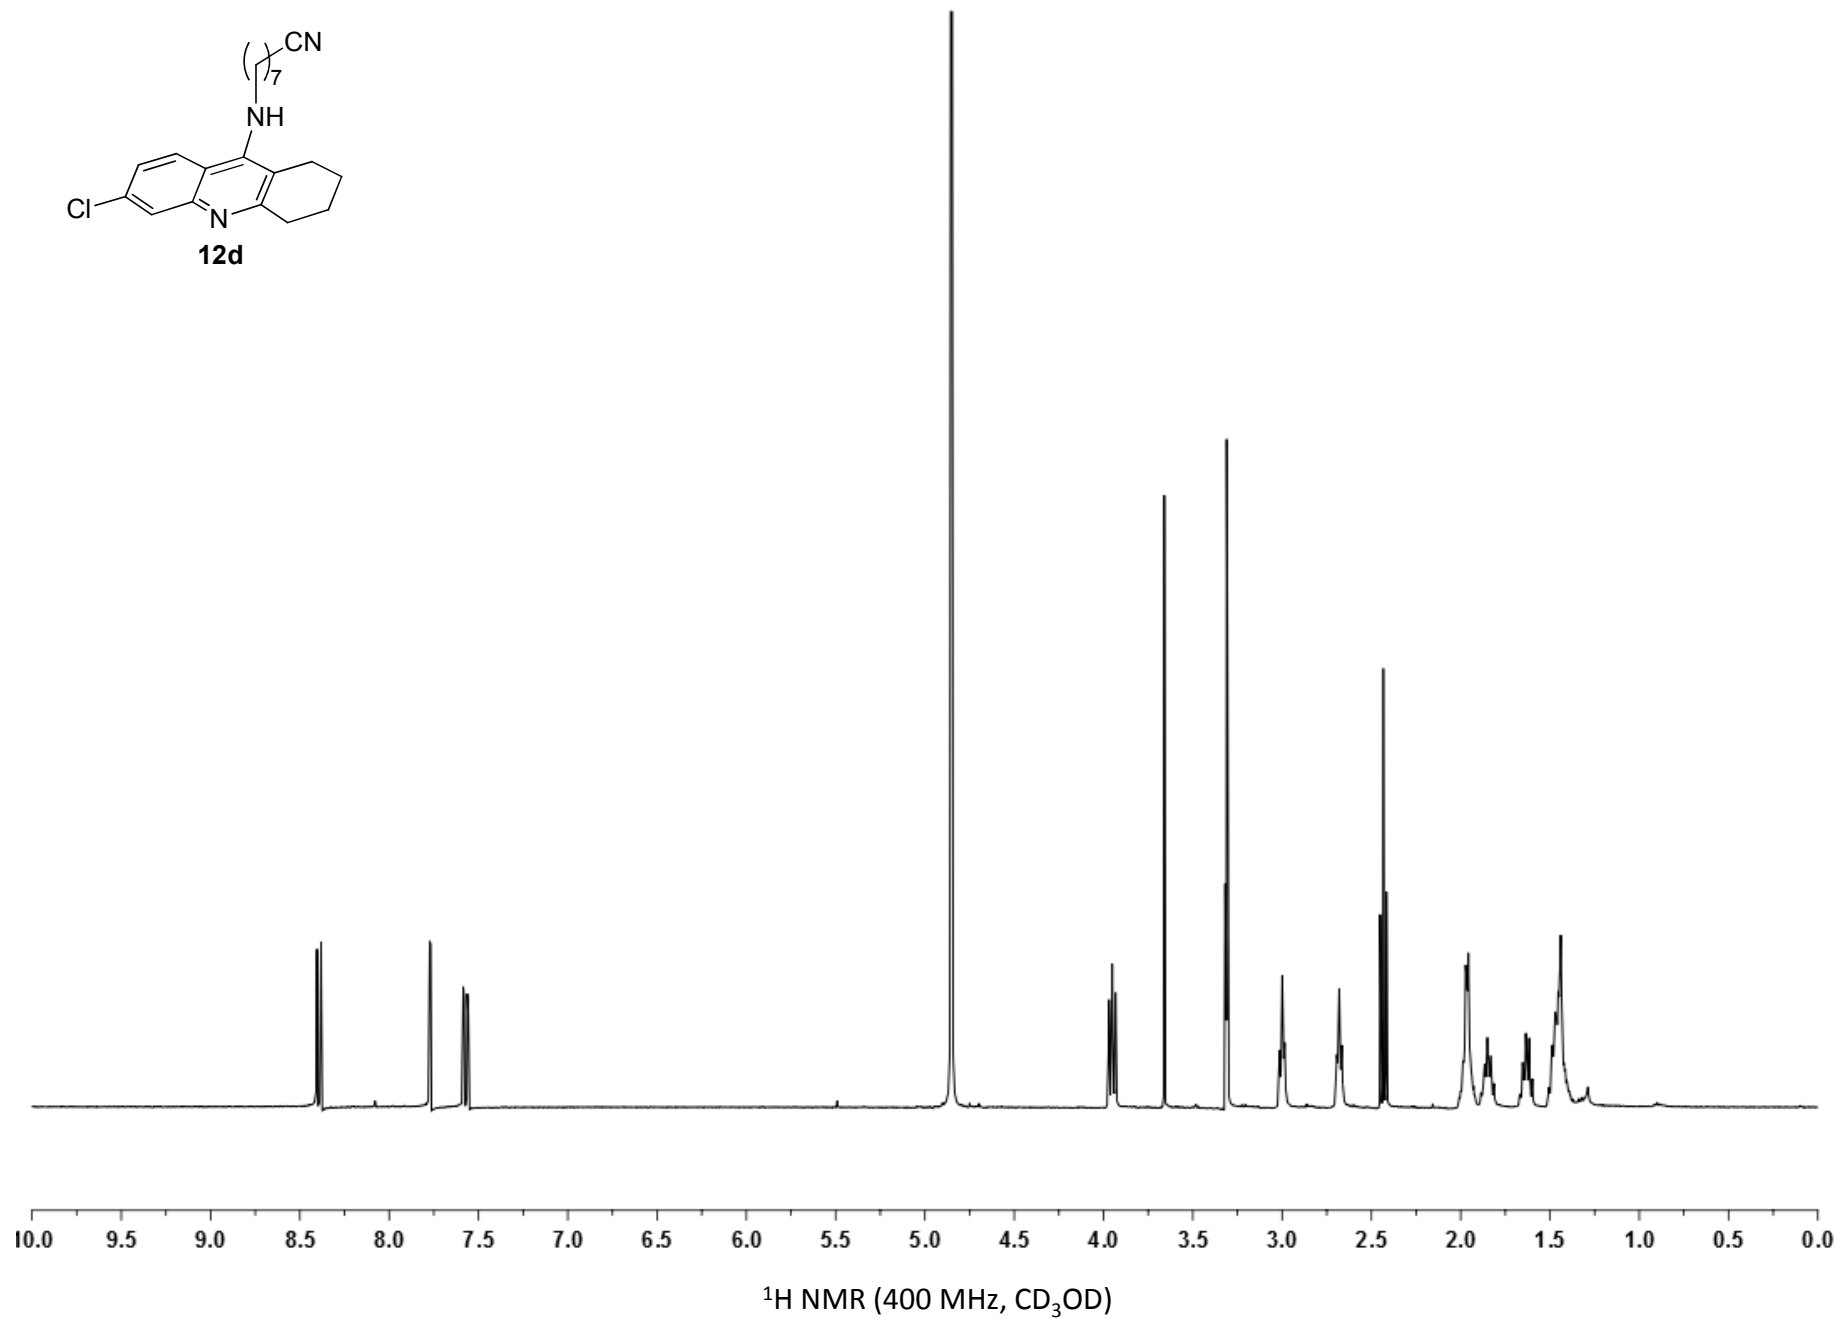



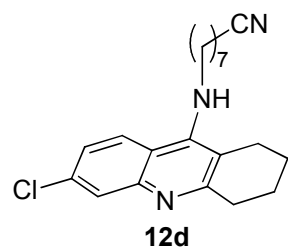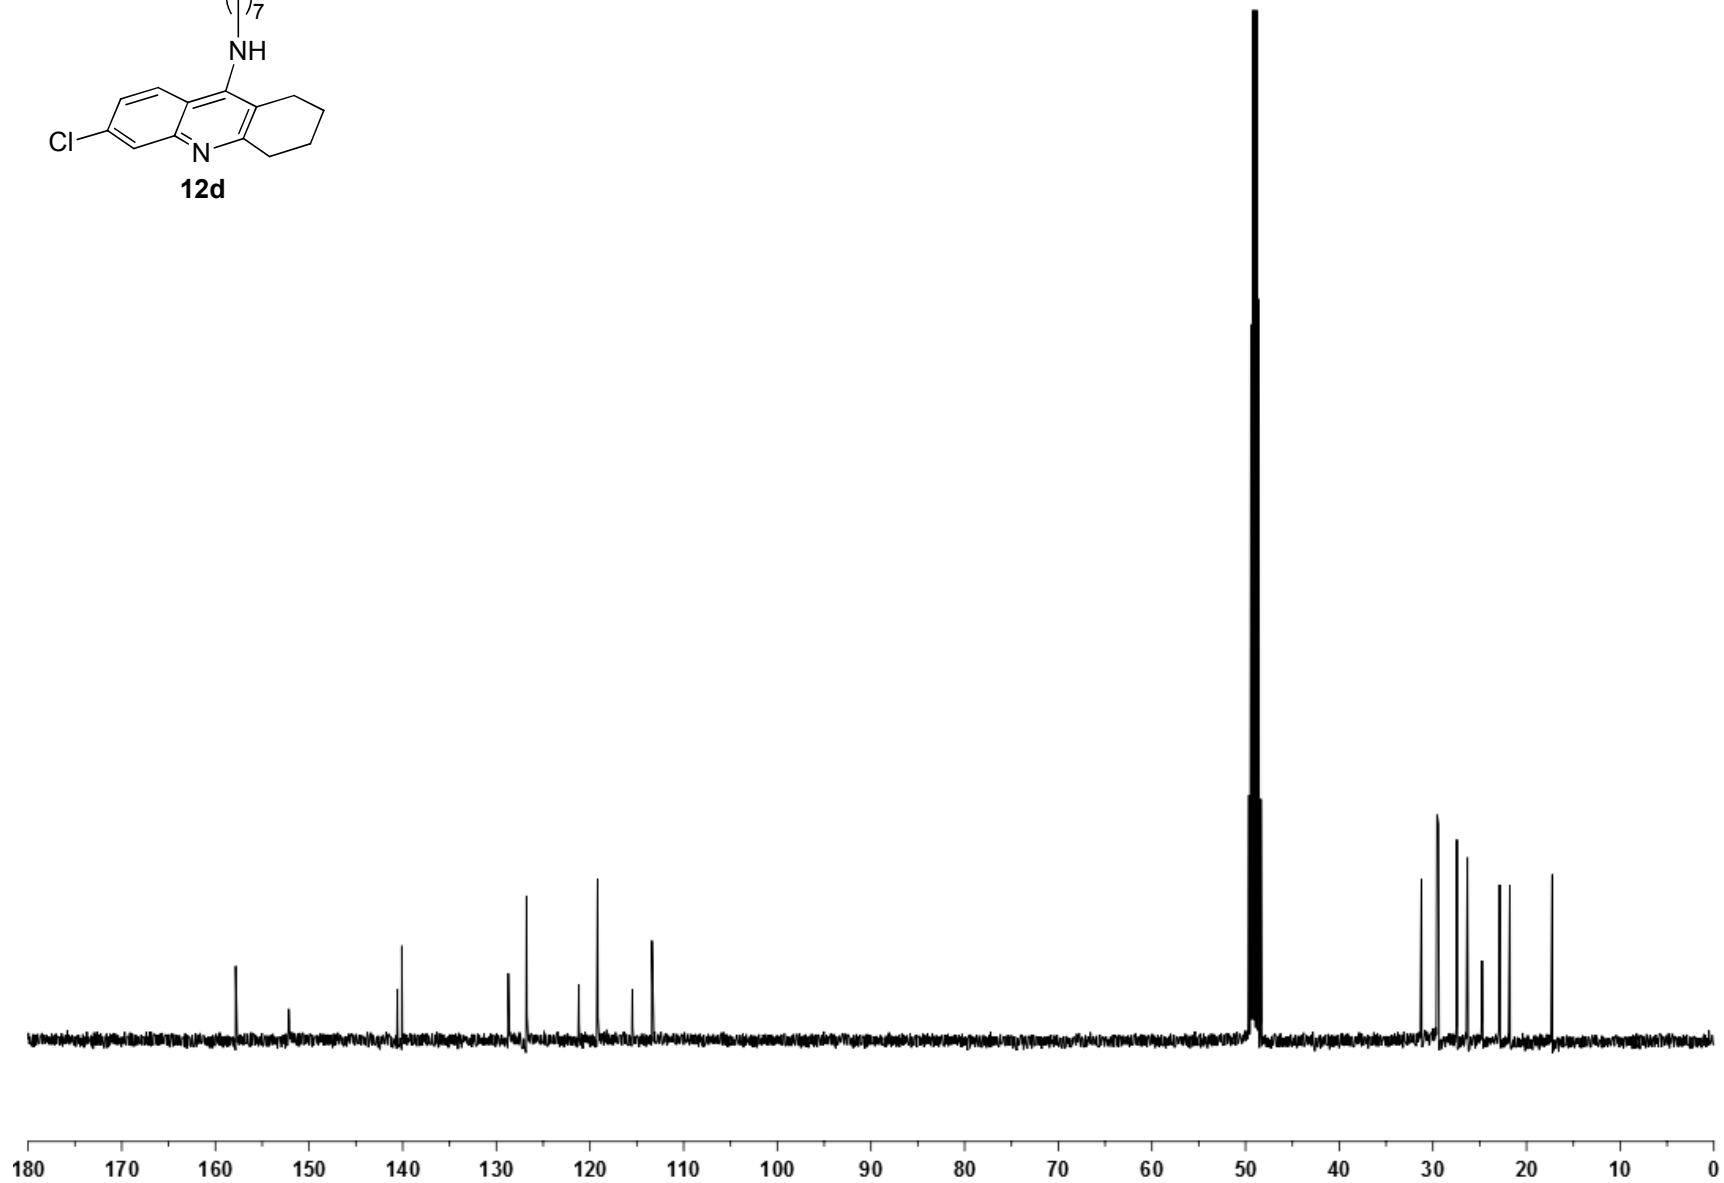

<sup>13</sup>C NMR (100.6 MHz, CD<sub>3</sub>OD)

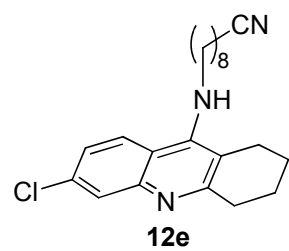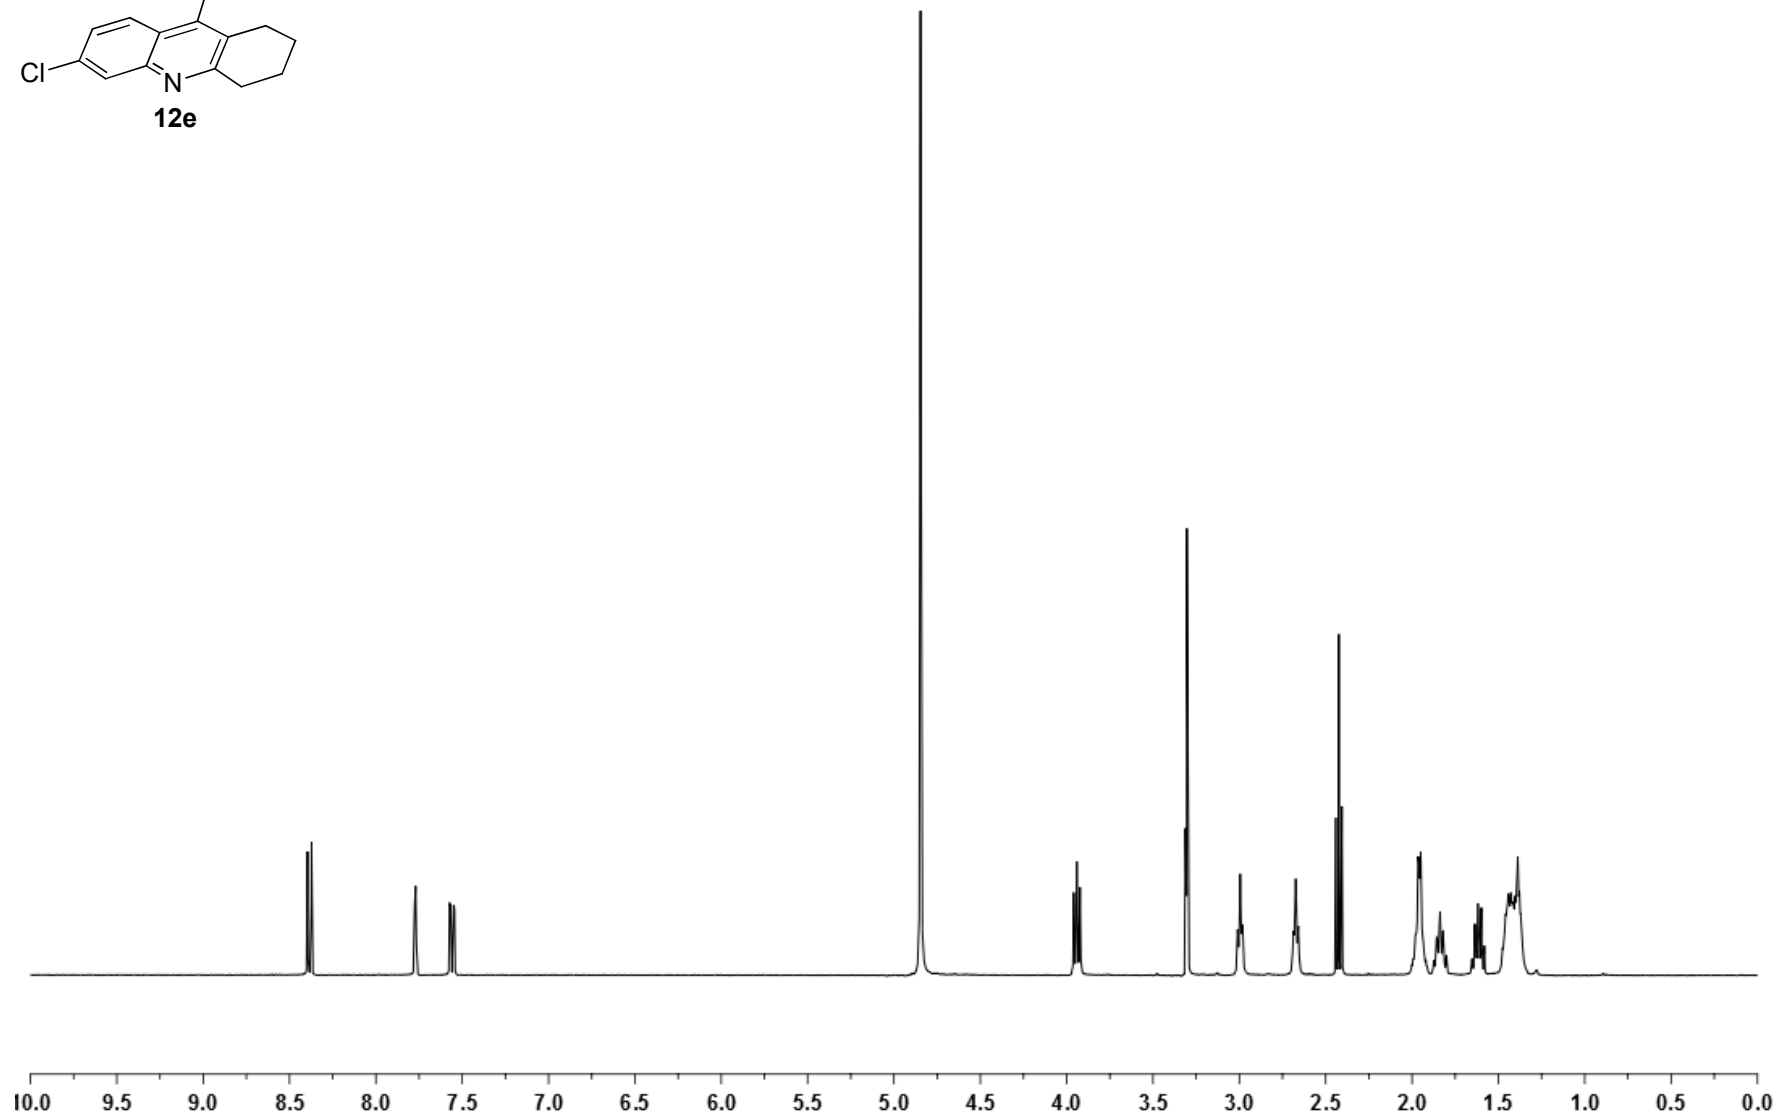

$^1\text{H}$  NMR (400 MHz,  $\text{CD}_3\text{OD}$ )

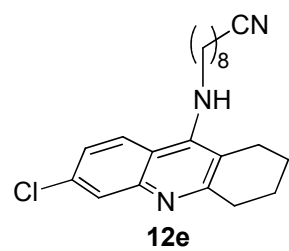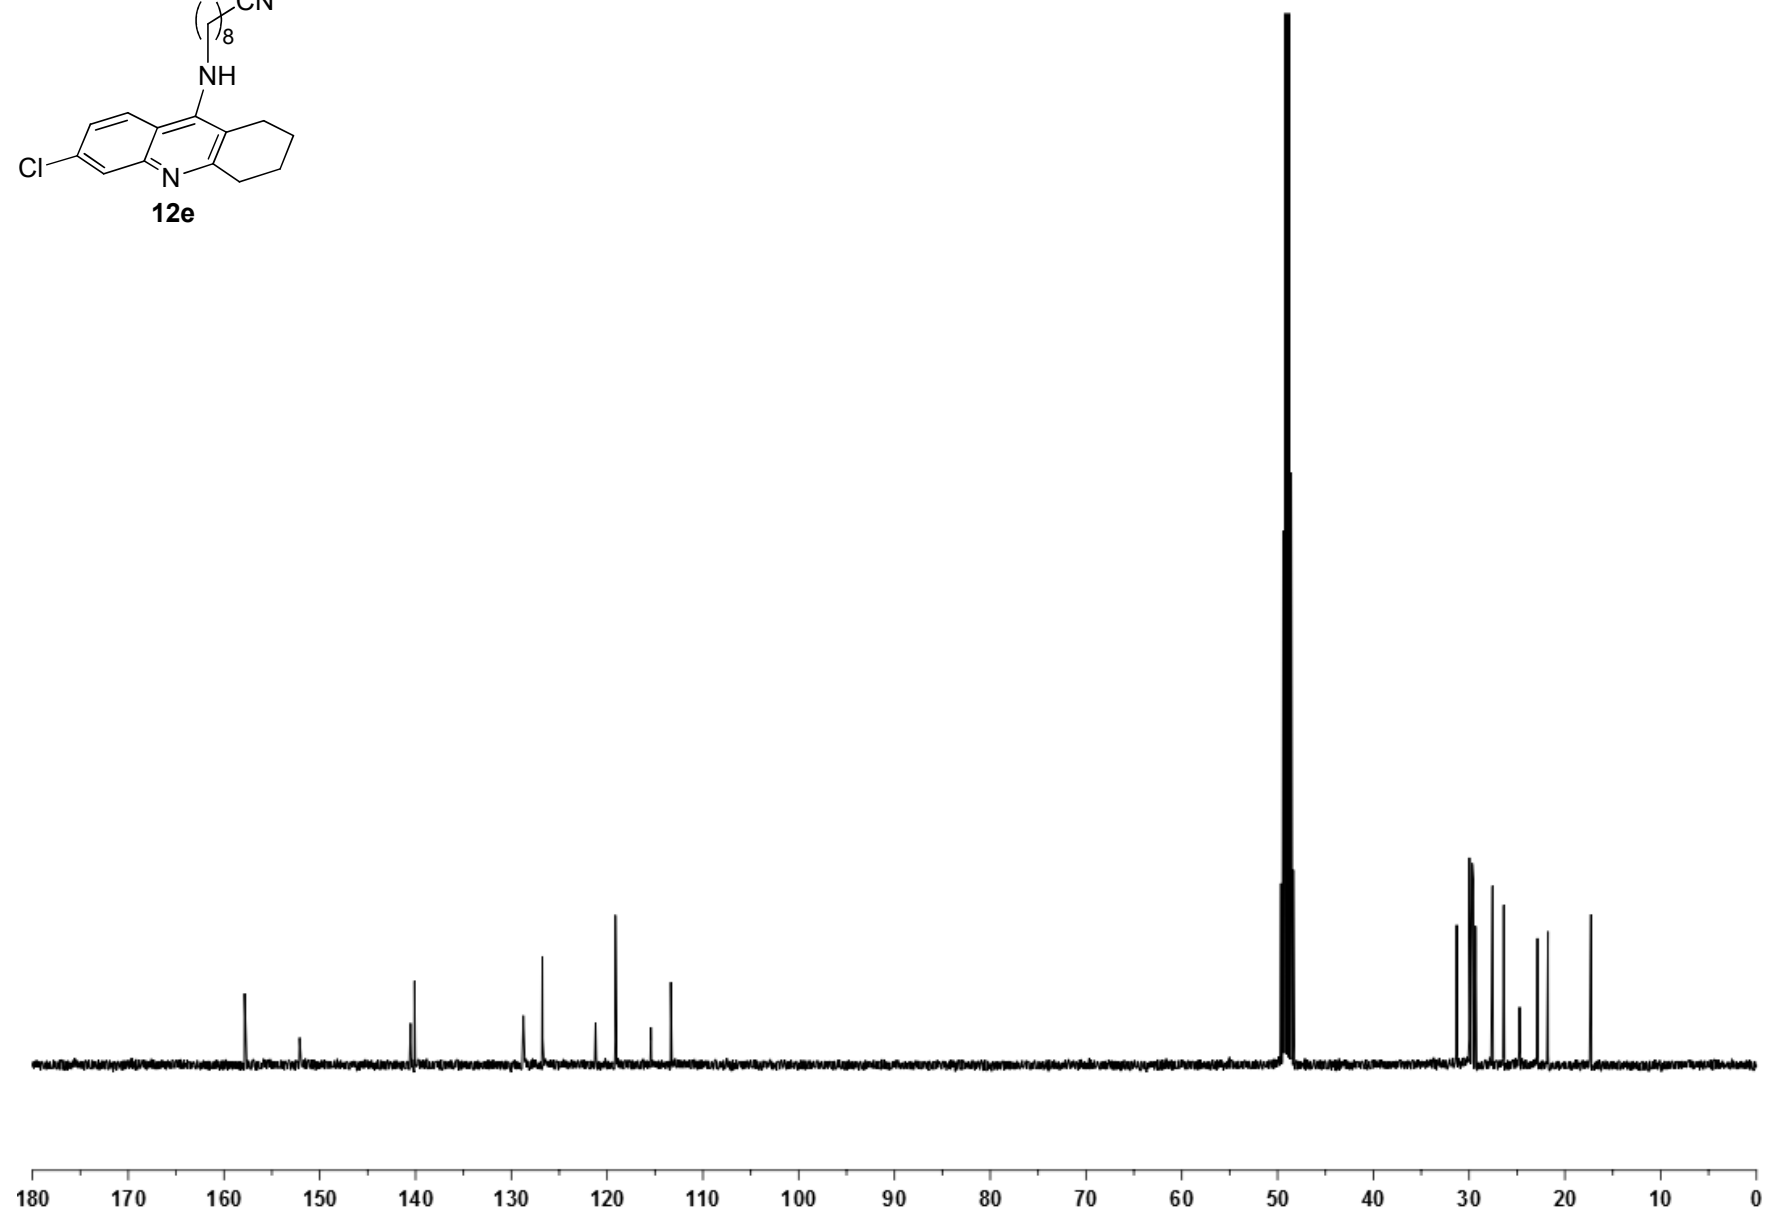

$^{13}\text{C}$  NMR (100.6 MHz,  $\text{CD}_3\text{OD}$ )

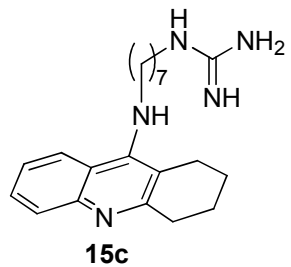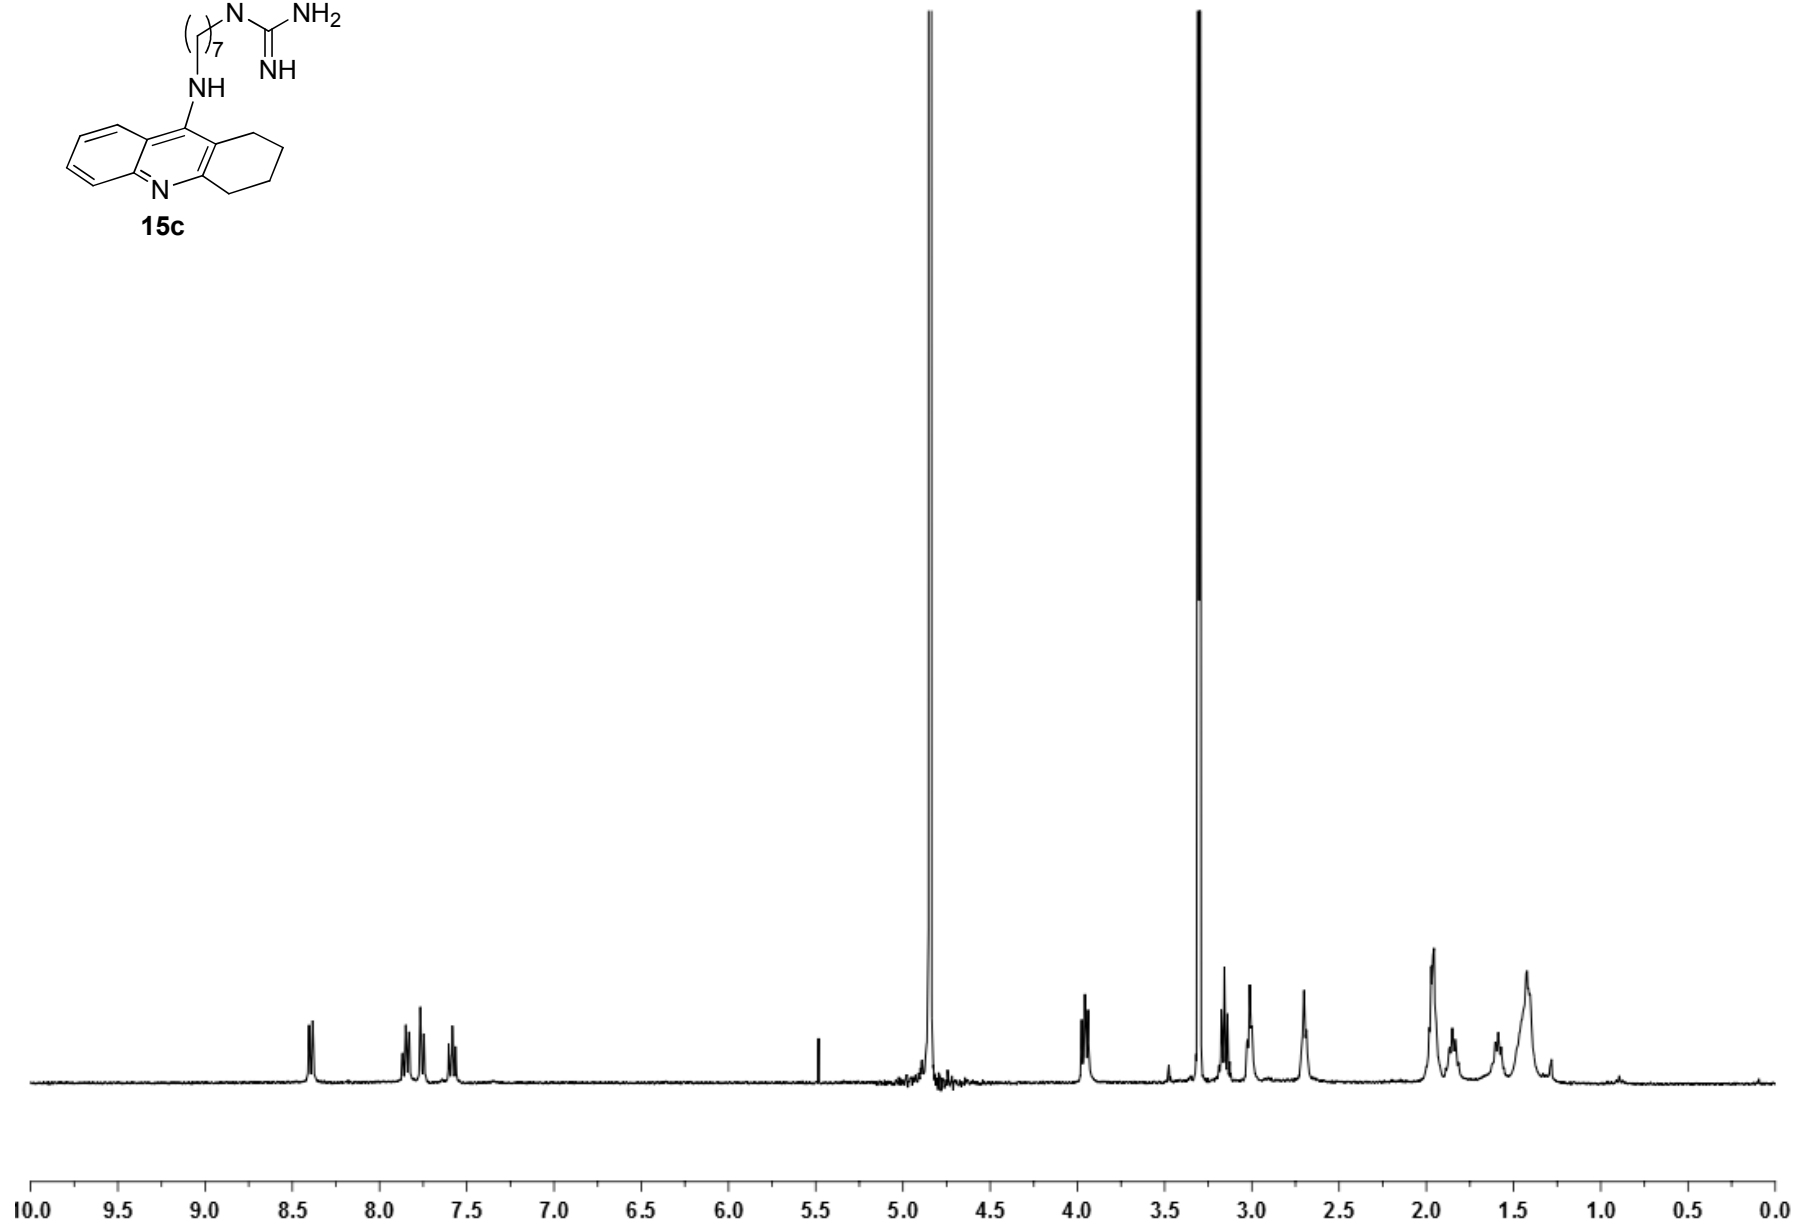

<sup>1</sup>H NMR (400 MHz, CD<sub>3</sub>OD)

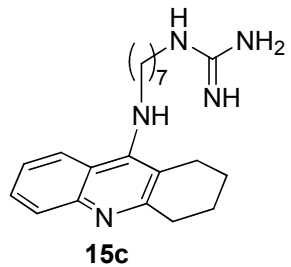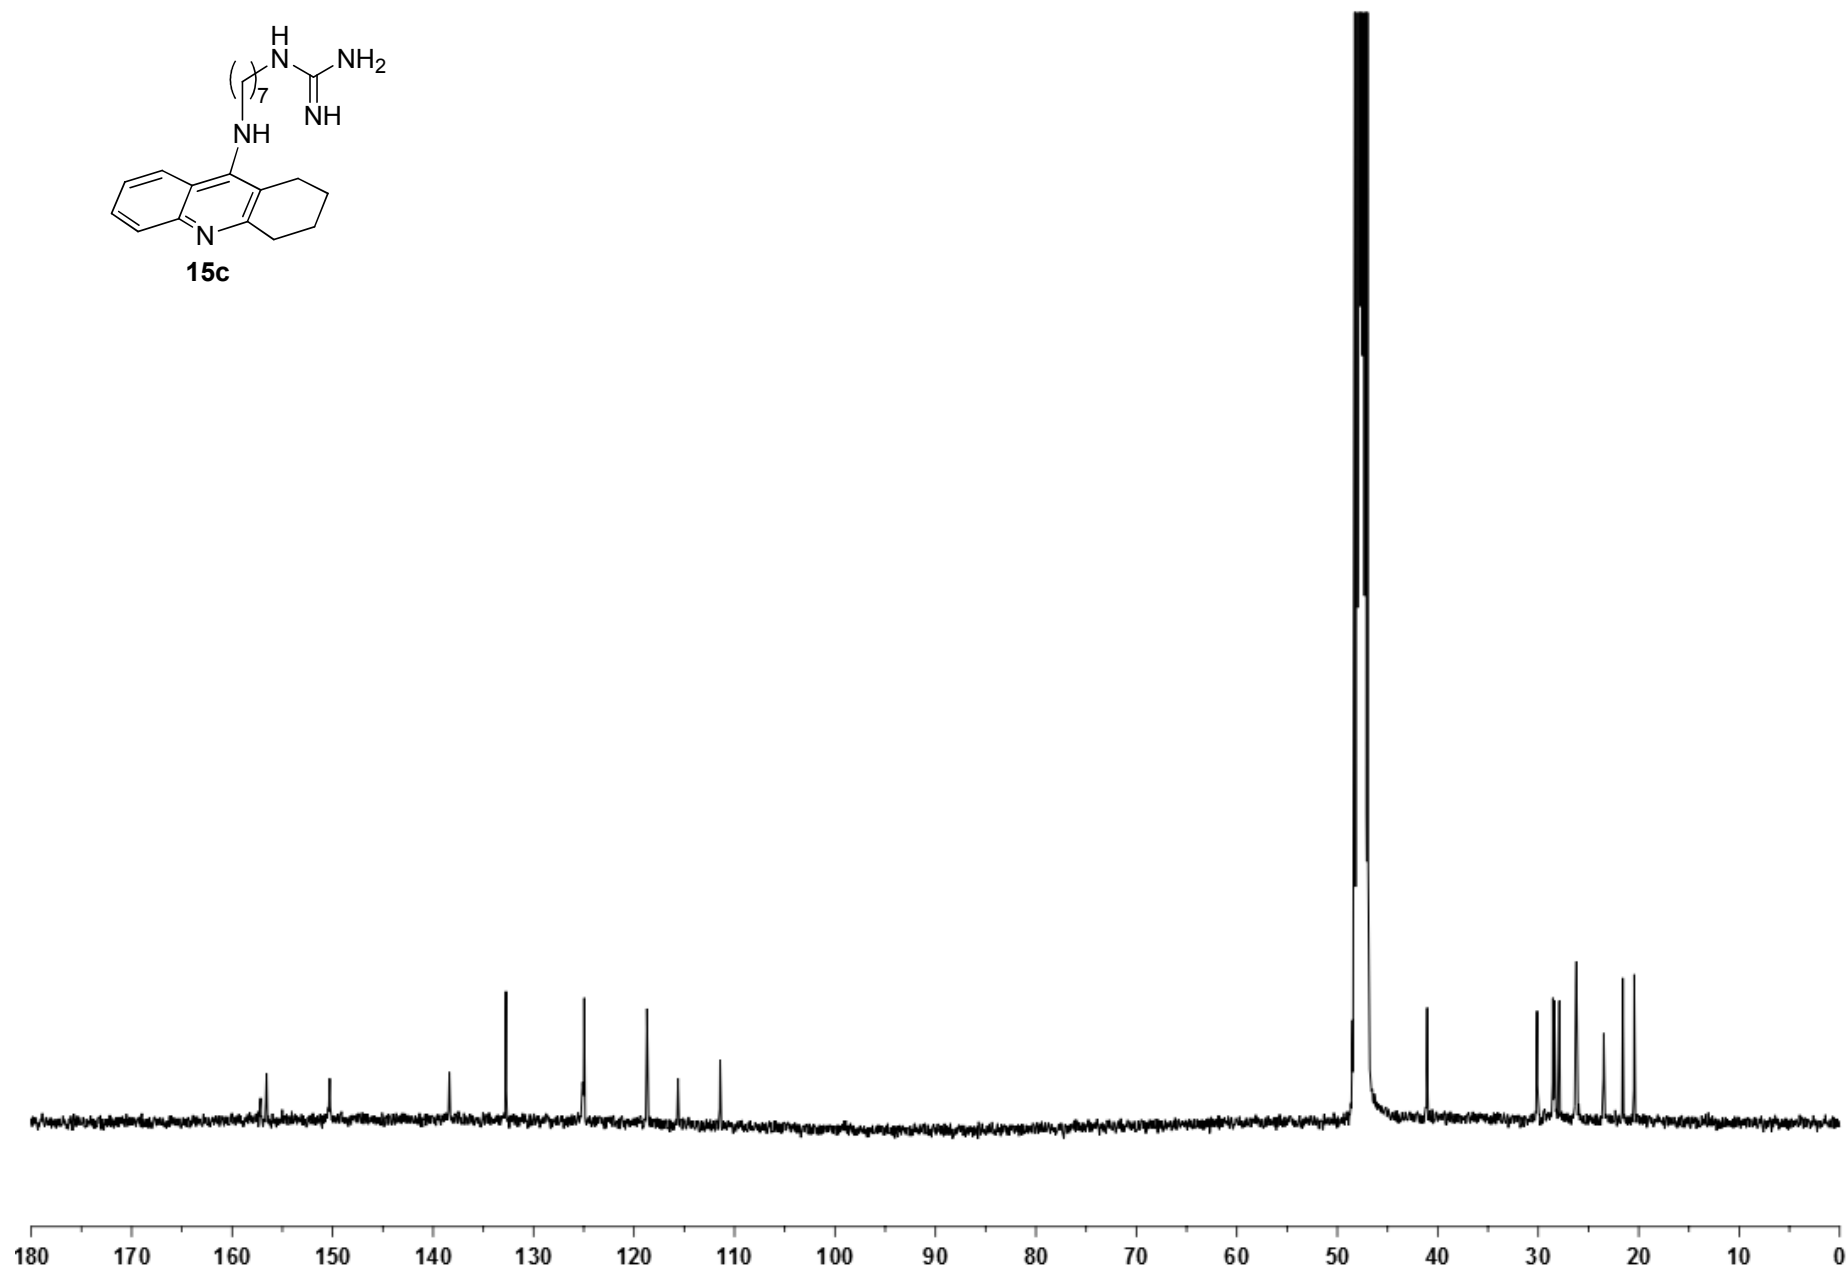

<sup>13</sup>C NMR (100.6 MHz, CD<sub>3</sub>OD)

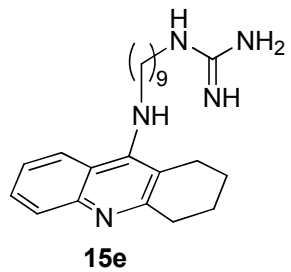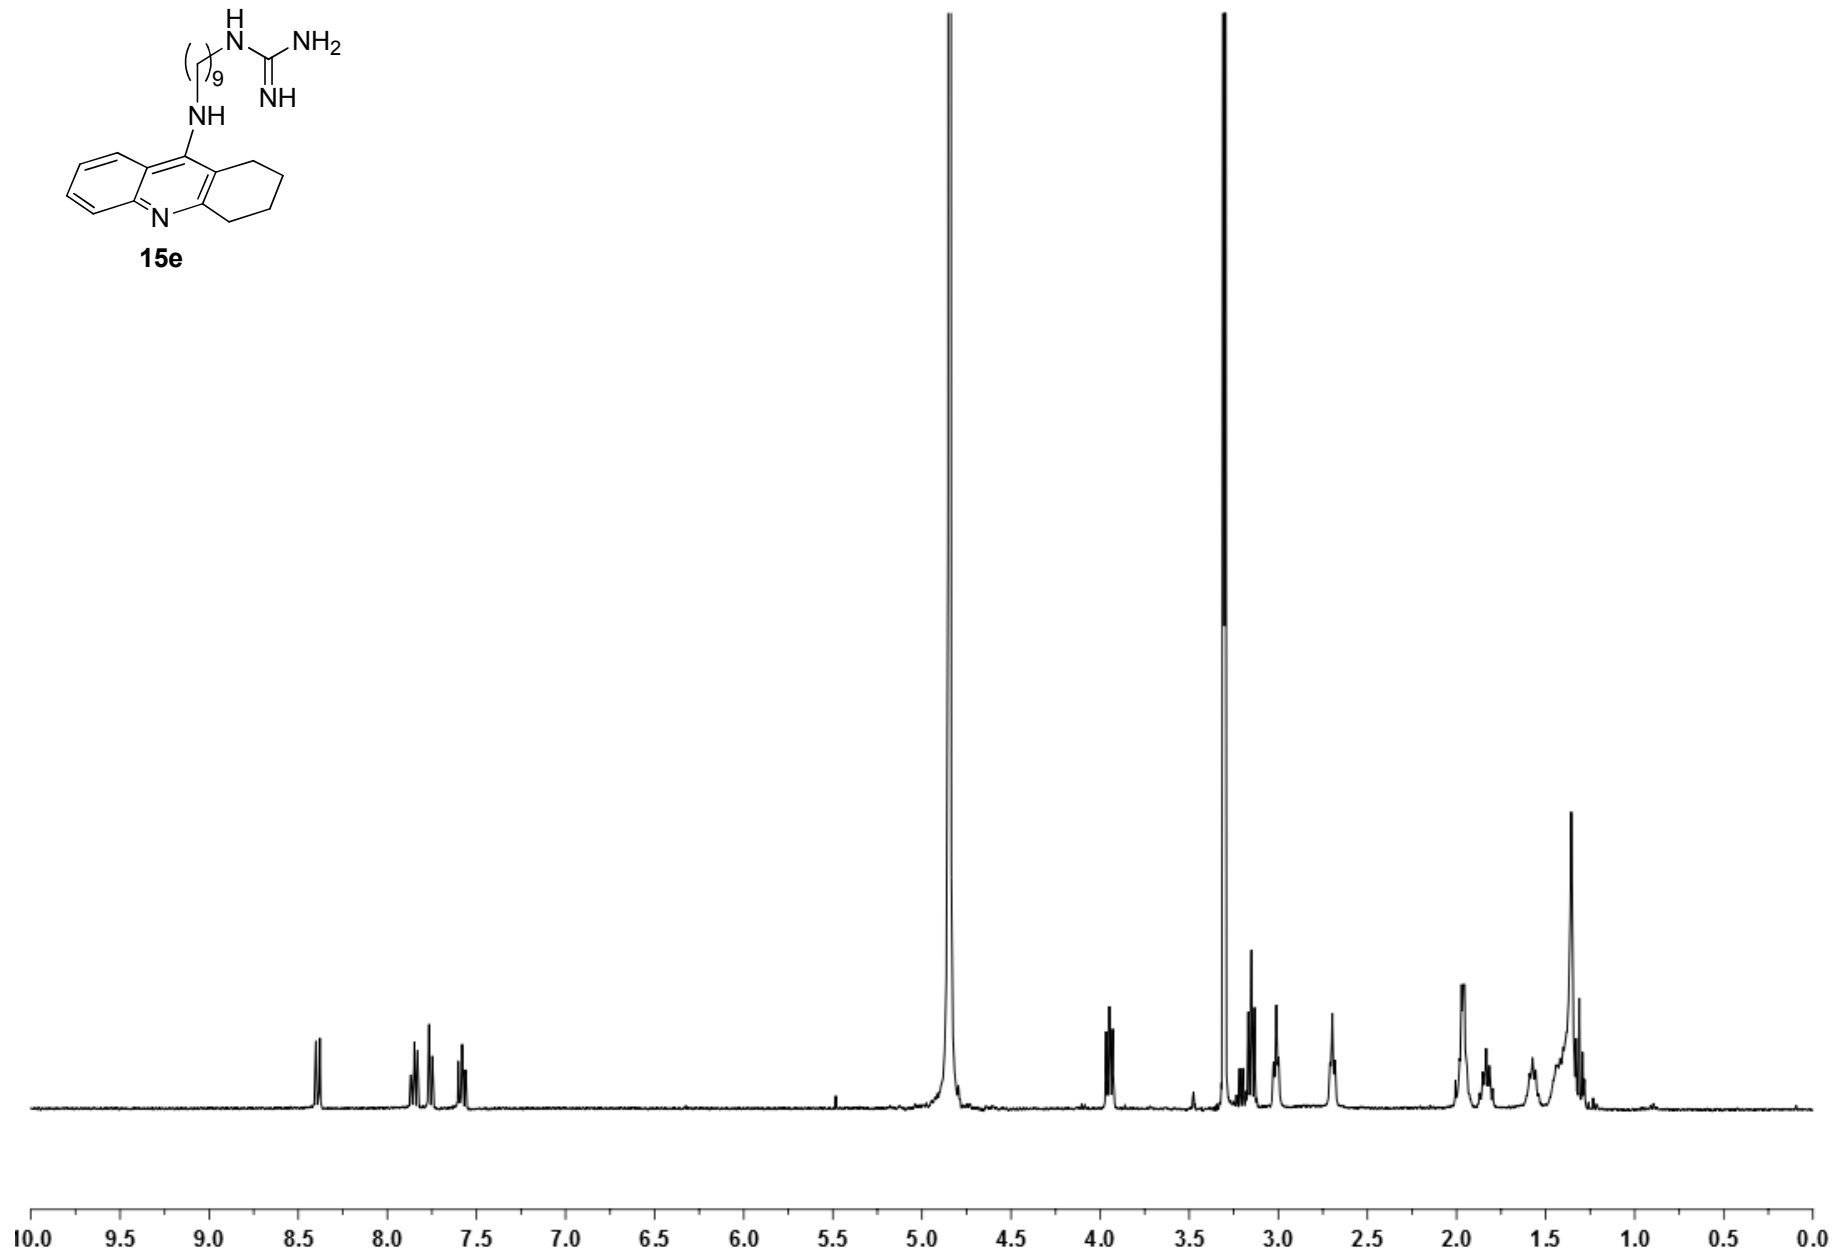

$^1\text{H}$  NMR (400 MHz,  $\text{CD}_3\text{OD}$ )

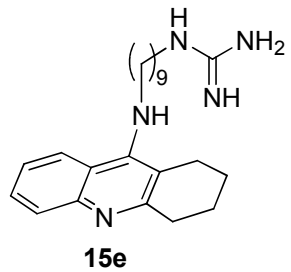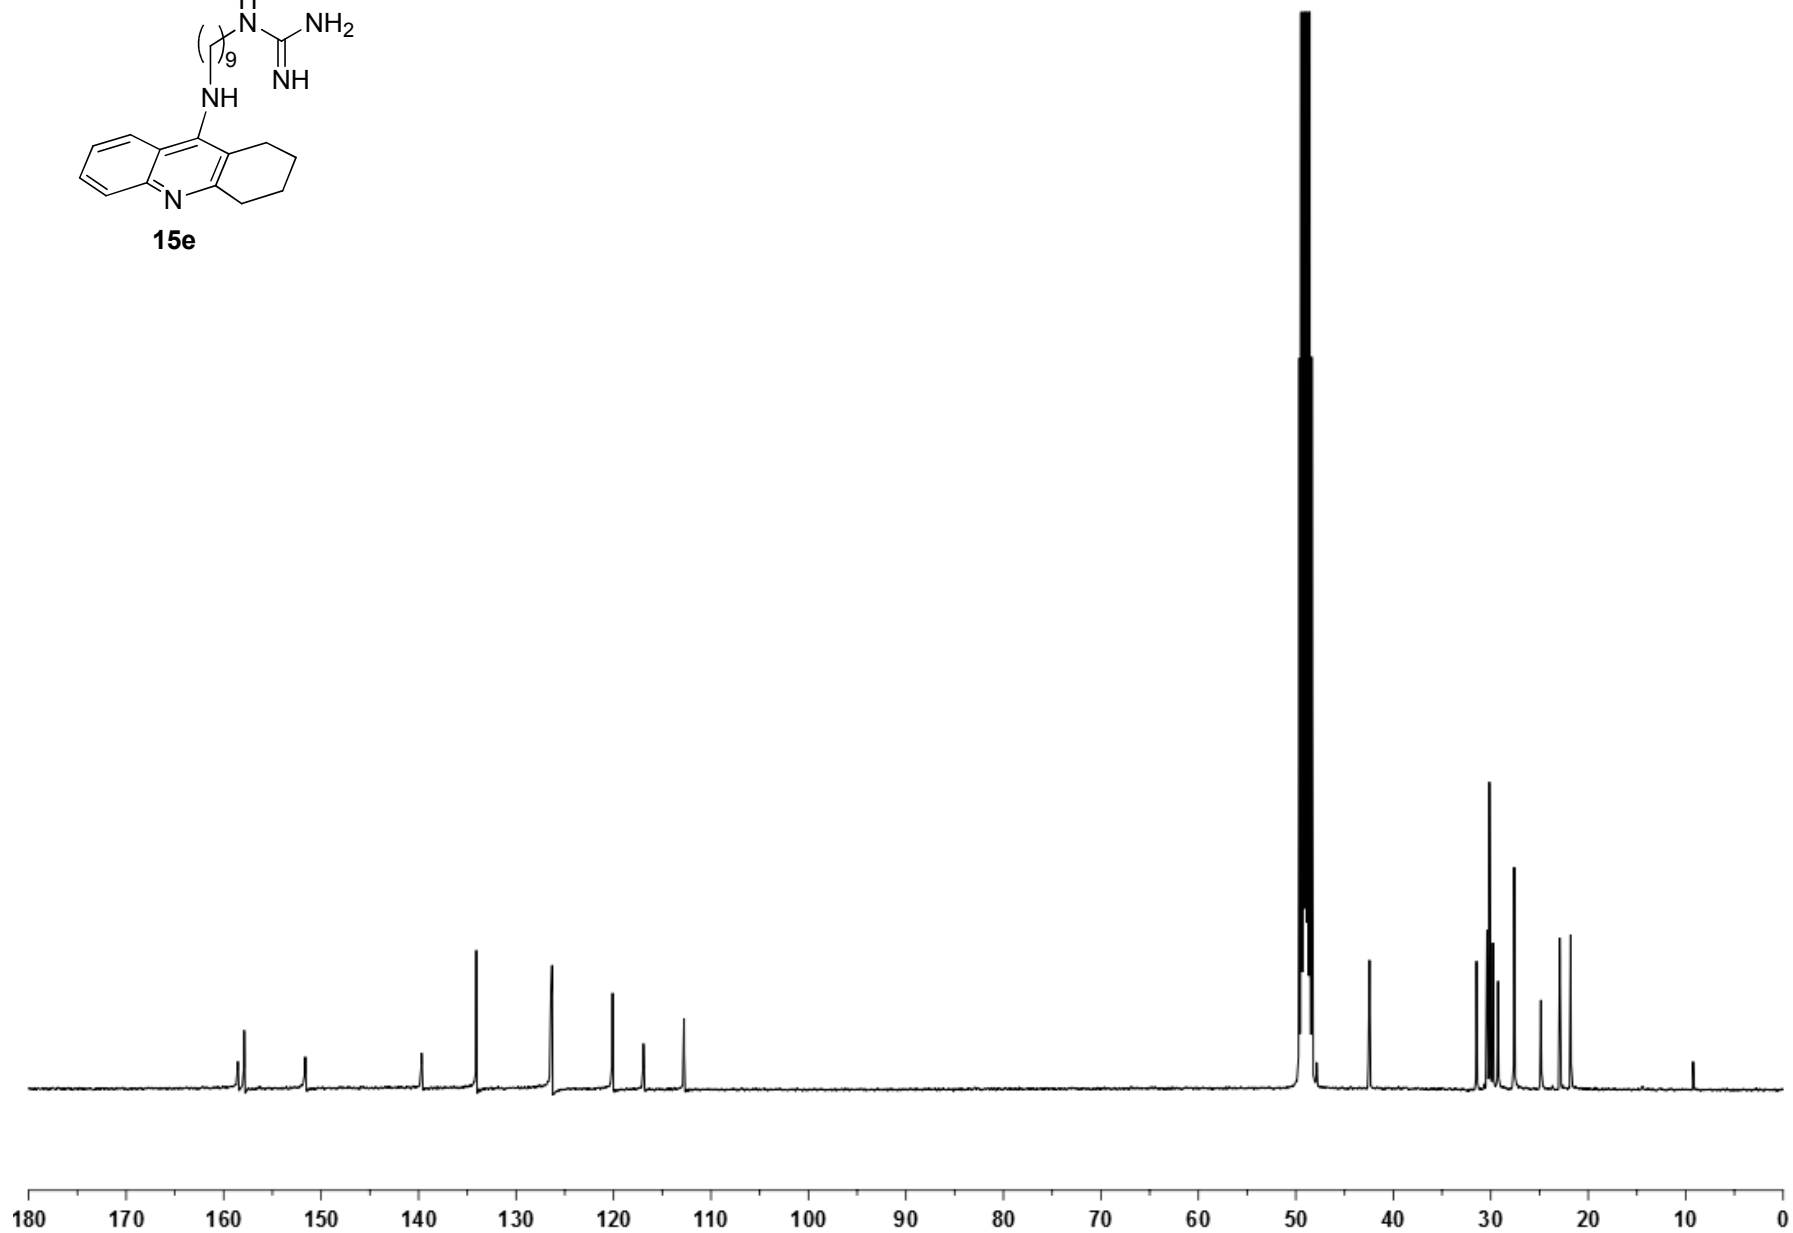

$^{13}\text{C}$  NMR (100.6 MHz,  $\text{CD}_3\text{OD}$ )

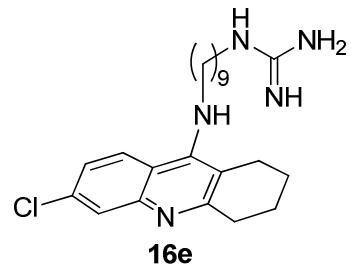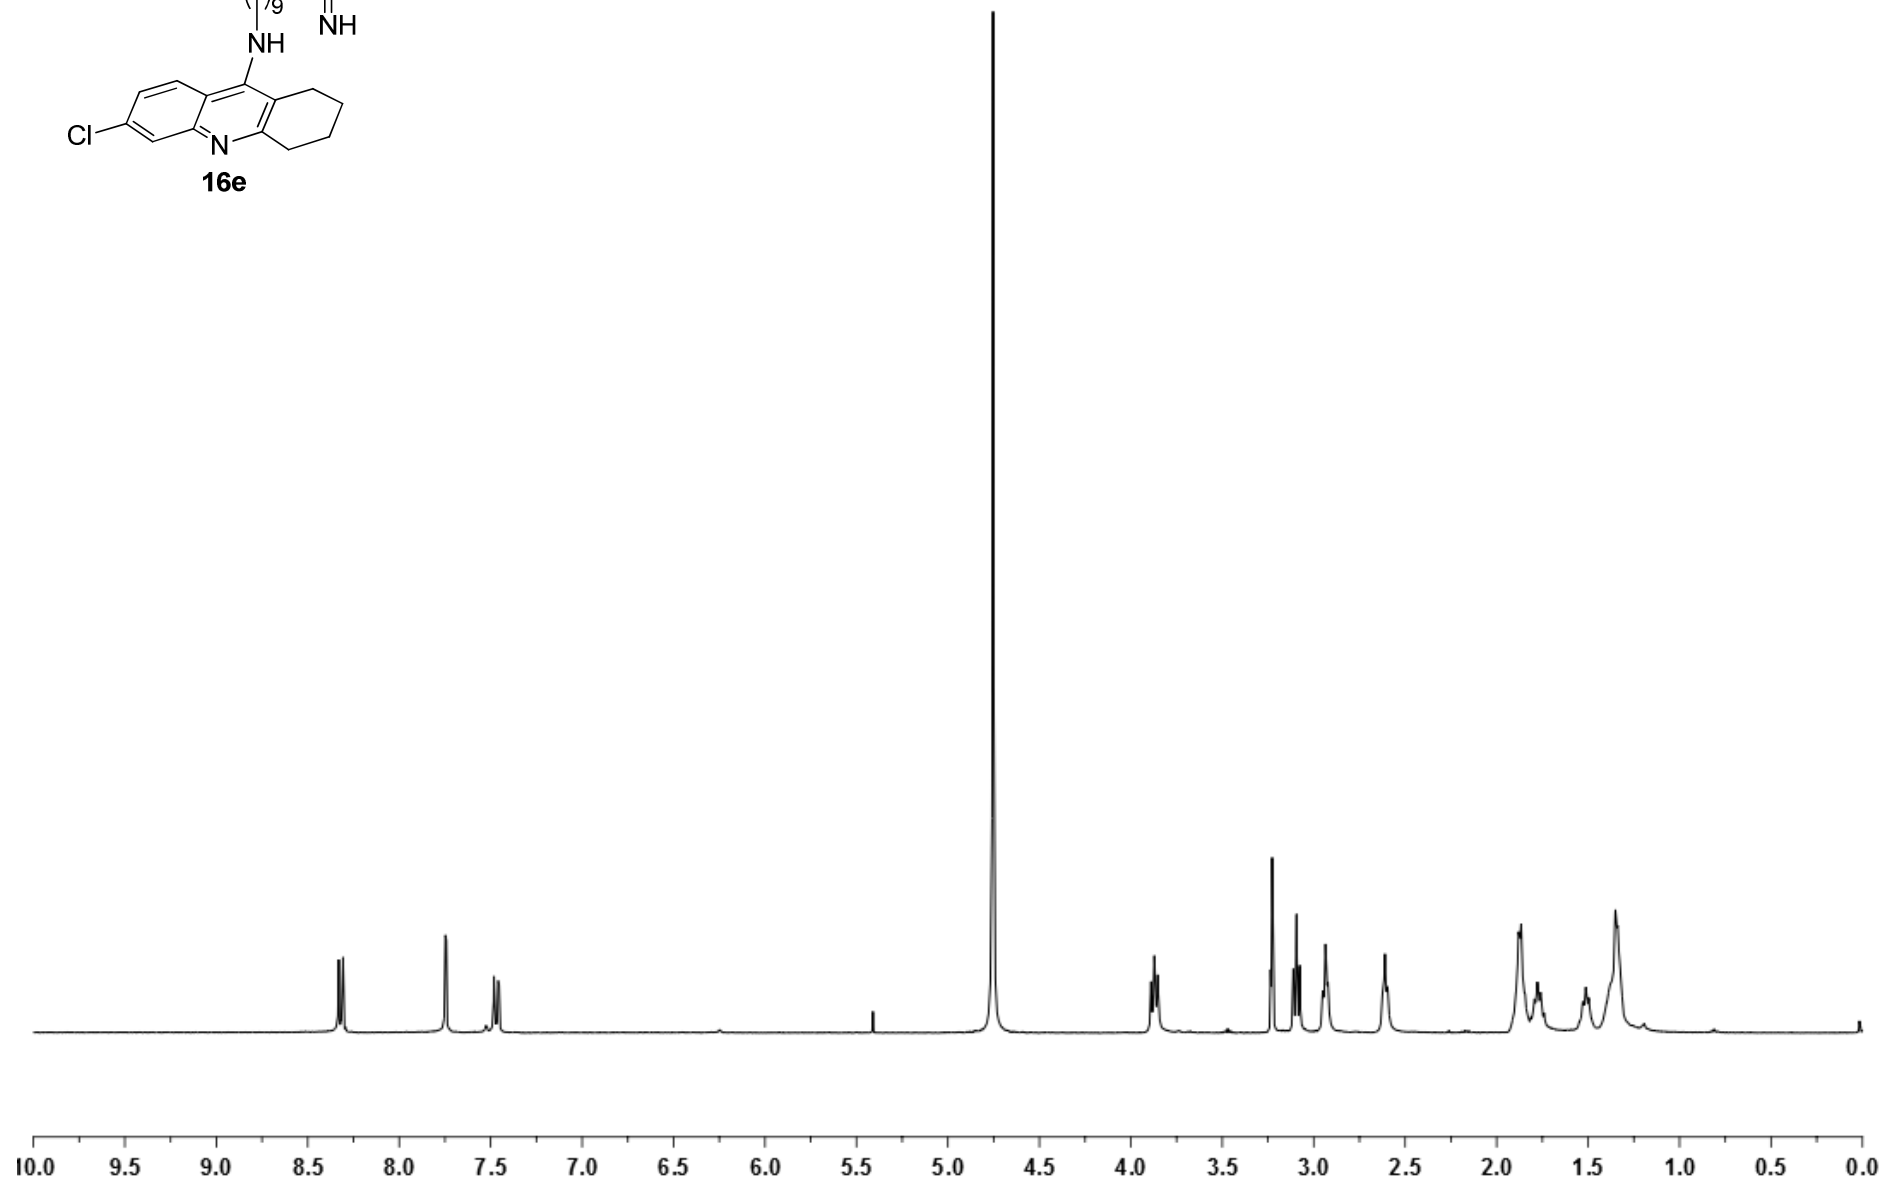

<sup>1</sup>H NMR (400 MHz, CD<sub>3</sub>OD)



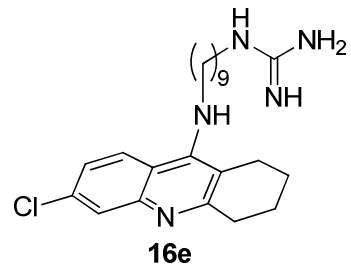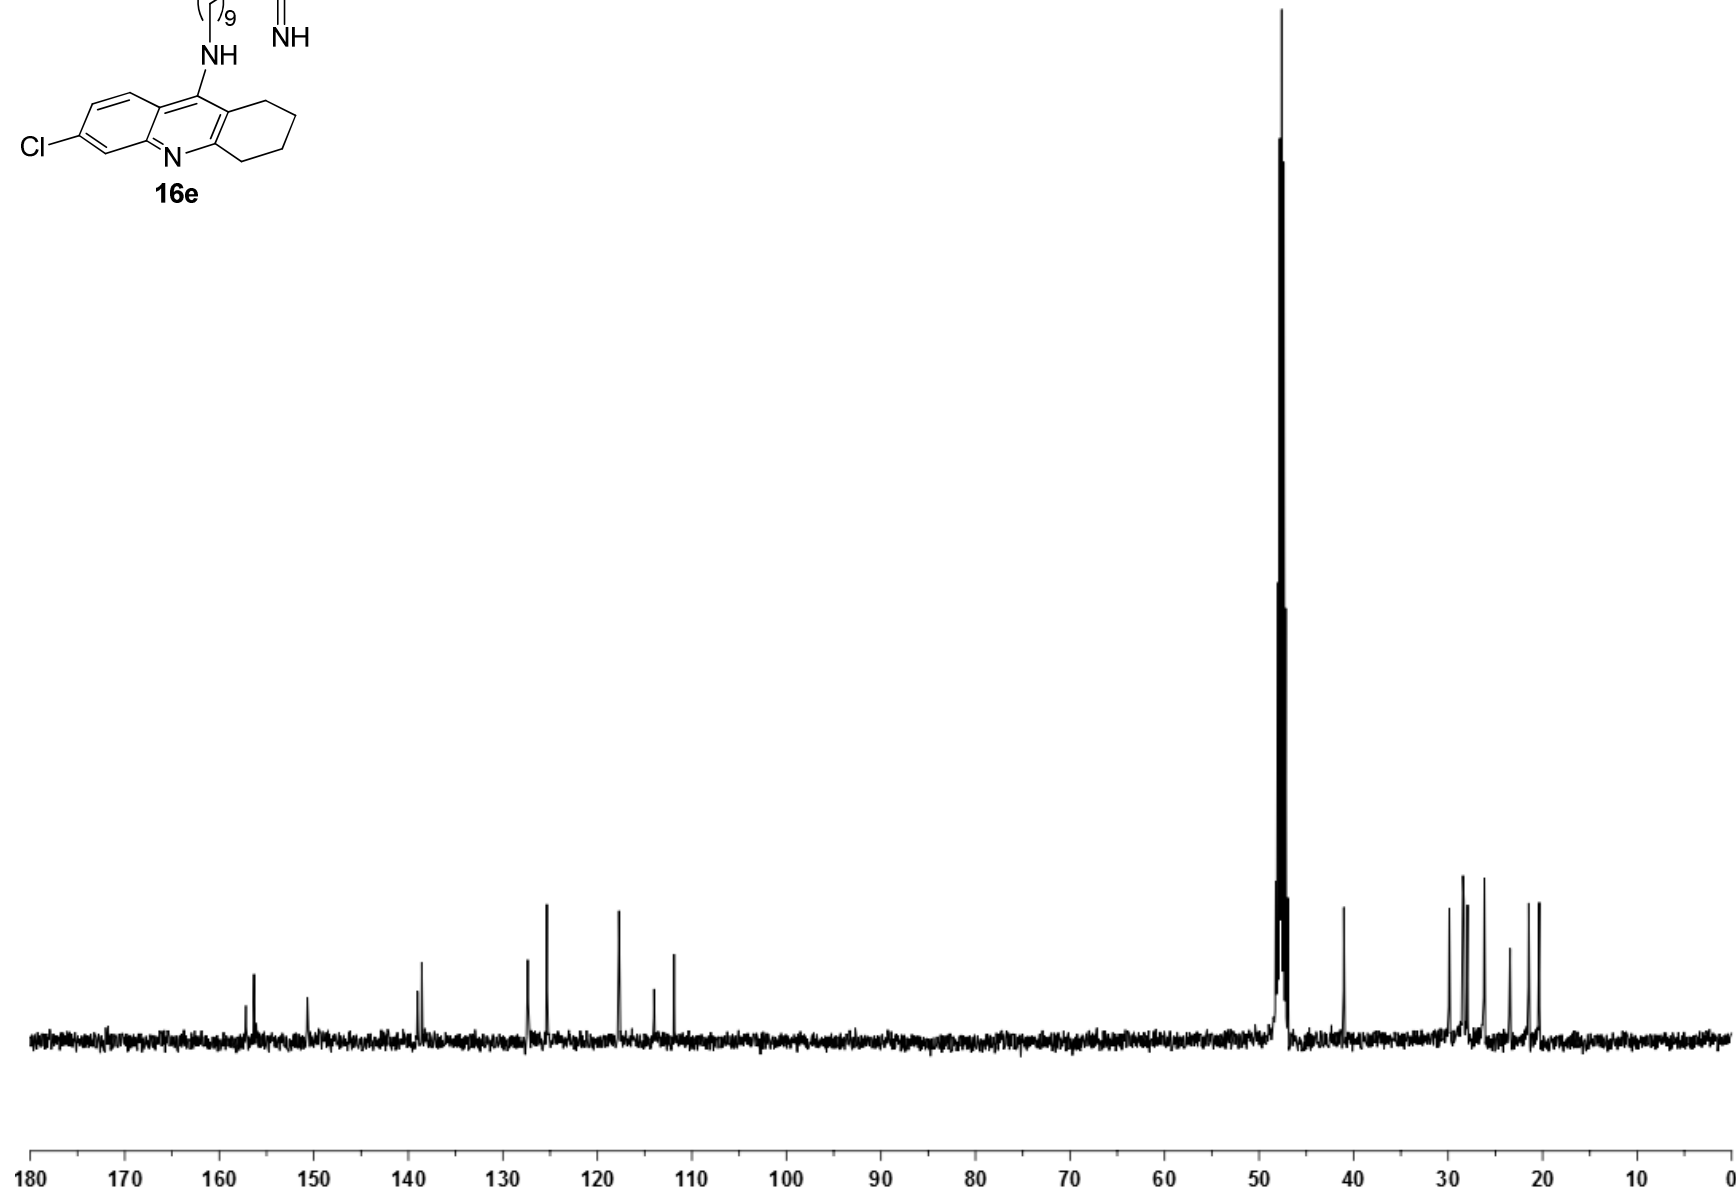

$^{13}\text{C}$  NMR (100.6 MHz,  $\text{CD}_3\text{OD}$ )
